# Supplementary material
Source: PubMed Central journal article supplement (PMC7879961)
Supplement: NIHMS1667367-supplement-Supporting_Information.pdf [file NIHMS1667367-supplement-Supporting_Information.pdf]

1 Comprehensive Subchronic Inhalation Toxicity  
2 Assessment of an Indoor School Air Mixture of  
3 PCBs

4 *Hui Wang<sup>1</sup>, Andrea Adamcakova-Dodd<sup>1</sup>, Susanne Flor<sup>1</sup>, Laura Gosse<sup>2</sup>, Violet E. Klenov<sup>3</sup>, Jeffrey*  
5 *Stolwijk<sup>2</sup>, Hans-Joachim Lehmler<sup>1,2</sup>, Keri C. Hornbuckle<sup>2,4</sup>, Gabriele Ludewig<sup>1,2</sup>, Larry W.*  
6 *Robertson<sup>1,2</sup>, Peter S. Thorne<sup>1,2\*</sup>*

7 <sup>1</sup>Department of Occupational and Environmental Health, <sup>2</sup>Interdisciplinary Graduate Program in  
8 Human Toxicology, <sup>3</sup>Department of Obstetrics and Gynecology, <sup>4</sup>Department of Civil and  
9 Environmental Engineering, the University of Iowa, Iowa City, Iowa 52242, United States

10 \*Corresponding Author:

11 Peter S. Thorne, Ph.D.

12 University of Iowa College of Public Health

13 100 CPHB S341A, 145 N Riverside Dr.

14 Iowa City, IA 52246

15 TEL: (319) 335-4216

16 [peter-thorne@uiowa.edu](mailto:peter-thorne@uiowa.edu)

17 Data generated in this research are available at <https://doi.org/10.25820/data.006120>.

18 **Table of Contents**

19 **Abbreviations**

20 **PCB Extraction and Quantification from Tissue and XAD**

21 **Morris Water Maze Test**

22 **Toxicity assessment**

23 **Tables:**

24 **Table S1.** Method Detection Limit (MDL) for each PCB congeners or co-eluted congeners.

25 **Table S2.** Recovery rate (%) of surrogate standards (PCB 14, d-PCB 65, and PCB 166) in tissues  
26 and SAM vapor extraction.

27 **Table S3.1** Average PCB congeners concentration in liver of SAM-exposure group. Values are  
28 expressed in ng/g wet tissue weight.

29 **Table S3.2** Average PCB congeners concentration in liver of SAM-exposure group. Values are  
30 expressed in ng/g lipid weight.

31 **Table S3.3** Average PCB congeners concentration in lung of SAM-exposure group. Values are  
32 expressed in ng/g wet tissue weight.

33 **Table S3.4** Average PCB congeners concentration in lung of SAM-exposure group. Values are  
34 expressed in ng/g lipid weight.

35 **Table S3.5** Average PCB congeners concentration in brain of SAM-exposure group. Values are  
36 expressed in ng/g wet tissue weight.

37 **Table S3.6** Average PCB congeners concentration in brain of SAM-exposure group. Values are  
38 expressed in ng/g lipid weight.

39 **Table S3.7** Average PCB congeners concentration in adipose tissue of SAM-exposure group.  
40 Values are expressed in ng/g wet tissue weight.

41 **Table S3.8** Average PCB congeners concentration in adipose tissue of SAM-exposure group.

42 Values are expressed in ng/g lipid weight.

43 **Table S3.9** Average PCB congeners concentration in serum of SAM-exposure group. Values are

44 expressed in ng/g wet weight.

45 **Table S3.10** Average PCB congeners concentration in serum of SAM-exposure group. Values

46 are expressed in ng/g lipid weight.

47 **Table S4.** Redox parameters and redox potentials ( $E_h$ ) in plasma.

48 **Figures:**

49 **Figure S1.** Schematic of PCB generation and nose-only exposure system.

50 **Figure S2.** PCB congener profile (in mass percentage, %) in sequential three-day collections of

51 PCB vapor using XAD.

52 **Figure S3.** PCB homologue composition (in mass percentage, %) in sequential three-day

53 collections of PCB vapor using XAD.

54 **Figure S4.** PCB homolog composition (in mass percentage, %) in tissues of SAM-exposed rats

55 and in generated SAM vapor.

56 **Figure S5.** Body weight (g) and relative tissue weight (g/g body weight) of rats in SAM- and

57 sham-exposed groups.

58 **Figure S6.** Cytokines concentration (pg/ml) in plasma from rats in sham- and SAM-exposure

59 groups.

60 **Figure S7.** Thyroid hormones (total T4 and total T3) concentration (nmol/L) in serum after

61 exposed to SAM vapor.

62 **Figure S8.** Antioxidant enzyme activities in liver. A: GPx-1, B: GPx-4, and C: catalase activity.

63 **Figure S9.** Trace elements content (Cu, Mn, Se, and Zn) in dried liver from rats exposed to SAM  
64 and sham.

65 **Figure S10.** Micronuclei (MN) number expressed as per 1000 reticulocytes (immature  
66 erythrocytes) from acridine orange coated slides in SAM-exposed and sham-exposed group.

67 **Figure S11.** Ovarian follicle number in a single section from SAM- and sham-exposed rats.

68 **Abbreviations**

|        |                                              |
|--------|----------------------------------------------|
| AMH    | anti-mullerian hormone                       |
| ASE    | accelerated solvent extractor                |
| BP     | bromopropane                                 |
| CAT    | catalase                                     |
| CFC    | colony-forming cell                          |
| CFU-G  | colony forming unit-granulocytes             |
| CFU-GM | colony forming unit-granulocytes, macrophage |
| CFU-M  | colony forming unit-macrophages              |
| CYPs   | cytochrome P450                              |
| Cys    | cysteine                                     |
| CySS   | cystine                                      |
| CySSG  | cysteine glutathione disulfide               |
| DE     | diatomaceous earth                           |
| EPA    | Environmental Protection Agency              |
| FSH    | follicle stimulating hormone                 |
| GC     | gas chromatography                           |
| GPx    | glutathione peroxidase                       |
| GSH    | glutathione                                  |
| GSSG   | glutathione disulfide                        |
| H&E    | haematoxylin and eosin                       |
| HNE    | hydroxynonenal                               |
| HPLC   | high performance liquid chromatography       |
| HSC    | hematopoietic stem cells                     |
| IL     | interleukin                                  |
| LH     | luteinizing hormone                          |
| MDA    | malondialdehyde                              |
| MDL    | method detection limit                       |
| MN     | micronuclei                                  |
| MS     | mass spectrometry                            |
| MWM    | Morris Water Maze                            |
| PCBs   | polychlorinated biphenyls                    |
| PLSDA  | partial least squares discriminant analysis  |
| RNS    | reactive nitrogen species                    |
| ROS    | reactive oxygen species                      |
| SAM    | school air mixture                           |
| TERT   | telomerase reverse transcriptase             |
| T3     | triiodothyronine                             |
| T4     | thyroxine                                    |
| TNF    | tumor necrosis factor                        |
| TRAP   | telomeric repeat amplification protocol      |
| TRF    | telomeric repeat binding factors             |

70 **PCB Extraction and Quantification from Tissue and XAD.** About 1 g of tissue was  
71 homogenized with diatomaceous earth (DE) and split into two equal fractions: fraction A (for  
72 PCB extraction) and fraction B (for lipid content analysis). Fraction A or XAD were spiked with  
73 a surrogate standard mixture (PCB 14, deuterium (<sup>2</sup>H)-labeled PCB 65, and PCB 166) before  
74 accelerated solvent extraction (ASE 350, Dionex, Sunnyvale, CA) with acetone-hexane (1:1, v/v)  
75 at 100°C and 10,340 kPa (1500 psi) with preheat for 6 min, 60% cell flush volume, and 1 static  
76 cycle of 5 min. Collected extracts were concentrated to 1 ml using a TurboVap (Caliper Life  
77 Science Inc., Hopkinton, MA) followed by mixing with 2 ml sulfuric acid for cleanup. The  
78 organic phase (top) was eluted through another sulfuric acid-acidified silica gel column for  
79 additional cleanup. Ultimately, concentrated extracts were transferred to vials and spiked with  
80 internal standard (<sup>2</sup>H-labeled PCB 30 and PCB 204) for PCB quantification using gas  
81 chromatography with tandem mass spectrometry (GC-MS/MS) modified from EPA method  
82 1668A<sup>1</sup> as previously described.<sup>2</sup> Fraction B was extracted with chloroform-methanol (2:1, v/v)  
83 using an ASE 200 as above. Lipid content in tissue was determined gravimetrically after  
84 evaporating all solvents in a vacuum concentrator (SpeedVac, Fisher Scientific, Pittsburgh, PA).  
85 Serum lipid content was calculated using the following formula:

86 
$$\text{Serum total lipid} = (2.27 \times \text{total cholesterol}) + \text{total triglycerides} + 62.3 \text{ mg/dL.}^3$$

87 Total cholesterol and triglycerides were measured at the University of Iowa Diagnostic Lab.

88 **Morris Water Maze Test.** The method was adapted from Vorhees and Williams<sup>4</sup>. A black  
89 circular tank (170 cm diameter, 60 cm high), surrounded with a black curtain, was filled with  
90 water (23 to 25°C). Four different cues (circle, square, triangle, and plus sign) were affixed on  
91 the tank wall above the water in four positions: north (N), east (E), south (S), and west (W). The

92 tank was divided into four equal-sized quadrants (NE, SE, SW and NW). A circular transparent  
93 platform (11 cm diameter, 30 cm high), submerged 1 to 2 cm below the surface of water, was  
94 placed in the center of SE quadrant and was unmoved during spatial acquisition test. In spatial  
95 acquisition test, all rats performed four trials each day for five consecutive days. During the four  
96 trials, rats were released into water facing the wall randomly from four positions (N, E, S and  
97 W). For each trial, rats were allowed to swim until they found the platform and remained on the  
98 platform for 20 s. If the rat didn't find the platform within 120 s, it was gently guided onto the  
99 platform to stay for 20 s, then was removed from the tank and dried with towels. The swimming  
100 paths were recorded by an overhead video tracking system. Several parameters reflecting the  
101 spatial learning abilities were analyzed, including the time latency to reach the platform, the  
102 length of the swimming path and the swimming speed. On the sixth day of probe trial, the hidden  
103 platform was removed, and the rats were allowed to swim for 60 s. The number of crossing  
104 platform and the time spent in the target quadrant where the previous platform was located were  
105 compared among groups to evaluate the reference memory.

## 106 **Toxicity assessment**

107 **GPx1 activity assay.** Tissue samples were flash frozen in liquid nitrogen after harvesting and  
108 stored at -80 °C until analyses. On the day of the assay, samples were homogenized in 1× RIPA  
109 lysate buffer (containing protease and phosphatase inhibitors) and centrifuged at 10,000 g for 10  
110 min, 4 °C. All activities were normalized to protein content, measured using the Lowry protein  
111 assay (Bio-Rad, Hercules, CA).<sup>5</sup> GPx1 activity was determined using UV-Vis spectroscopy, by  
112 following the oxidation of NADPH as earlier described.<sup>6,7</sup> First, a 55.6 mM (pH 7.4) potassium  
113 phosphate buffer (PB) was made containing: 1.1 mM NaN<sub>3</sub> and 1.1 mM EDTA. Secondly, the  
114 working buffer was made containing: 1.33 mM glutathione and 1.33 U/mL glutathione disulfide

115 reductase (GR) in stock buffer. A 2.5 mM H<sub>2</sub>O<sub>2</sub> solution and a 4 mM NADPH solution were  
116 prepared in PB and kept on ice to prevent oxidation. All components, except H<sub>2</sub>O<sub>2</sub> were  
117 combined, homogenized and incubated at 25 °C for 5 min. Then H<sub>2</sub>O<sub>2</sub> solution was added to  
118 start the reaction. The rate of NADPH oxidation was then monitored at 340 nm ( $\epsilon = 6,220 \text{ M}^{-1}$   
119  $\text{cm}^{-1}$ ).

120 **GPx4 activity assay.** The activity assay is based on a version described by Stolwijk, et al. <sup>8</sup>. A  
121 100 mM (pH 8.0) Tris/HCl buffer was made containing: 1.5 mM NaN<sub>3</sub> to inhibit catalase, and  
122 2.0 mM EDTA (chelator). Additionally, Triton X-100, peroxide free (Sigma-Aldrich: X100PC),  
123 was added as a surfactant to achieve a 0.1% volume percentage of Triton X-100. Glutathione  
124 disulfide reductase, from baker's yeast (Sigma-Aldrich: G3664), solution of 15 U/mL was  
125 made. A 60 mM glutathione (Sigma-Aldrich: G4251) was made in assay buffer, as well as, 4  
126 mM NADPH in 0.1% NaHCO<sub>3</sub>. The buffer, GR solution, GSH solution, NADPH solution, and  
127 sample were combined in a cuvette and incubated at 37 °C for 5 min. To monitor the kinetics, the  
128 oxidation of NADPH was monitored for 480 s (8 min). Background oxidation of NADPH was  
129 monitored for 4 min, then, 15  $\mu\text{L}$  of ~2 mM PCOOH solution was added into the cuvette to start  
130 the reaction. The rate of NADPH oxidation was then monitored at 340 nm ( $\epsilon = 6,220 \text{ M}^{-1} \text{ cm}^{-1}$ ).

131 **Catalase activity assay.** Catalase activity was determined using UV-Vis spectroscopy by  
132 following the rate of removal (oxidation) of hydrogen peroxide due to catalase.<sup>9, 10</sup> Hydrogen  
133 peroxide has an absorbance at wavelength of 240 nm,  $\epsilon_{240} = 39.4 \text{ M}^{-1} \text{ cm}^{-1}$  <sup>11</sup> that was monitored.  
134 The protein content (Lowry protein assay) in each assay was determined and used to normalize  
135 the activity of catalase per mg protein (mk U/mg protein). The assay was conducted in a 55.6  
136 mM (pH 7.0) potassium phosphate buffer. Then a 30 mM H<sub>2</sub>O<sub>2</sub> solution was added and the



137 analysis was started. The absorbance of hydrogen peroxide was monitored over 120 s at 10 s  
138 intervals.

139 **Micronuclei test**<sup>12</sup>. Acridine orange (AO) was dissolved in distilled water (1 mg/ml) and spread  
140 10  $\mu$ l using a glass rod onto pre-heated (70°C) clean glass slides and left to air dry. Five  $\mu$ l of  
141 whole blood was pipetted onto the center of the AO-coated slide and coverslipped. Scoring was  
142 done with the combination of a blue excitation (e.g. 490 nm) and a yellow to orange barrier filter  
143 (e.g. 525 nm) and coded slides were analyzed by counting micronuclei per 1000 reticulocytes  
144 (immature erythrocytes).

145 **Bone marrow cells isolation.** Bone marrow nucleated cells were isolated from femurs of  
146 Sprague-Dawley rats as described by Zhang, et al.<sup>13</sup>. The cells were washed with Dulbecco's  
147 Modified Eagle Medium DMEM supplemented with 20% heat inactivated fetal bovine serum  
148 (FBS) and 1% penicillin/streptomycin (complete DMEM) and passed through a 70  $\mu$ m nylon  
149 strainer to remove cell clumps and debris. After initial centrifugation, red blood cells were lysed  
150 and clearing of turbidity was achieved by incubating the cells with Flow Cytometry Mouse Lyse  
151 Buffer (R&D Systems, Minneapolis, MN) for 10 min at room temperature. After washing with  
152 Iscove's Modified Dulbecco's Medium IMDM/2% FBS, cell numbers were counted by an  
153 Accuri flow cytometer and 3 different cell suspensions were made in IMDM/2% FBS.

154 **Colony forming cell (CFC) assay.** We performed a CFC assay to measure the absolute number  
155 of viable and functional progenitor cells in the bone marrow. A total of  $2 \times 10^6$  cells in 4 ml  
156 IMDM were counted again and a new cell suspension of  $6 \times 10^5$  cells in 2 ml IMDM/2% FBS was  
157 made and 300  $\mu$ l of this was added into 3 ml rat Methycellulose Complete Media without Epo  
158 (R&D Systems, Minneapolis, MN) to set the final cell number at  $3 \times 10^4$  cells/ml. Then 1.1 ml of

159 the cell suspension was plated in duplicate in 35-mm untreated culture dishes. Dishes were  
160 incubated in a humid incubator at 37°C, 5% CO<sub>2</sub> for 12 days prior to enumeration. Three  
161 different colonies: colony forming unit-granulocytes (CFU-G), colony forming unit-  
162 macrophages (CFU-M) and colony forming unit-granulocytes, macrophage (CFU-GM) were  
163 counted via light microscopy and gridded scoring dish.

164 **Telomerase activity.** 3×10<sup>6</sup> bone marrow cells were washed once with Phosphate buffered  
165 saline (PBS) and were resuspended in cell lysis buffer and incubated on ice for 20 min. After  
166 centrifugation at 16,000×g for 20 min at 4°C, the supernatant was transferred into new tubes and  
167 stored at -80°C. The protein concentration of the supernatant was determined by Bradford  
168 Protein Assay (Bio-Rad, Hercules, CA). The SYBR Green based quantitative PCR reaction was  
169 performed by adding 100 ng of TS primer (5'-AATCCGTCGGAGCAGGTT-3'), 50 ng of CX  
170 primer (5'-CCCTTACCCTTACCCTTACCCTAA-3')<sup>14</sup>, 2.5 µl cell lysate supernatant, 12.5 µl  
171 Power SYBR Green PCR master mix from Applied Biosystems (Foster City, CA) and 9.7 µl of  
172 DNase- and RNase-free water into the well of a 96-well microplate. Samples were incubated for  
173 20 min at room temperature and PCR was performed by incubating the sample at 95°C for 10  
174 min followed by 35 cycles of 95°C for 30 s and 60°C for 90 s using an Eppendorf RealPlex  
175 Thermal Cycler (Eppendorf, Hamburg, Germany). The threshold cycle (Ct) value was  
176 established from the semi-log amplification plots (log increase in fluorescence versus cycle  
177 number) and compared with the standard curves generated from serial dilutions of cell extracts.  
178 Each sample was analyzed in duplicate.

179 **Quantitative real-time PCR.** 4×10<sup>6</sup> bone marrow cells were washed once with PBS and total  
180 RNA was extracted from each sample using RNeasy Plus mini kit from Qiagen (Valencia, CA)  
181 following the manufacturer's protocol and quantified using a NanoDrop2000 (Thermo Fisher

182 Scientific, Wilmington, DE). Total RNA was reverse transcribed using the High Capacity cDNA  
183 Reverse Transcription Kit from Applied Biosystems (Foster City, CA). The cDNA was  
184 subsequently used for quantitative real-time RT-PCR (qRT-PCR) using an Eppendorf RealPlex  
185 thermal cycler. The PCR program used started with 95°C for 10 min followed by 35 cycles at  
186 95°C for 30 s, 60°C for 30 s, and 72°C for 1 min. The primers for the quantification of selected  
187 genes were purchased from Integrated DNA Technologies (IDT) (Coralville, IA) and were as  
188 follows: *Tert*: Forward, 5'-AGCTGCTGAGGTCATTCTTC-3', and reverse, 5'-  
189 GCTTGCTCCACACACTCTTA-3'; *Trf-1*: Forward, 5'-CAGCTCACTACAGGACAGTTAAA-  
190 3', and reverse, 5'-CTCTCTCACACACACACAAA-3'; *Trf-2*: Forward, 5'-  
191 GTGTTTCCCTTCAGTGGTTTG-3', and reverse, 5'-GAGAGCCTATGTGCTCCTAATG-3'  
192 (all designed by PrimerQuest); *Gadph*: forward, 5'-TGGAGAAACCTGCCAAGTATG-3', and  
193 reverse, 5'-GGGTGGTCCAGGGTTTCTTA-3'<sup>15</sup>. An amplification threshold in the linear range  
194 of each sample was selected to calculate the C<sub>T</sub> for each sample. The relative mRNA levels were  
195 calculated with the relative standard curve method.

196 **Gut Microbiota analysis.** The colon fecal samples were sent to Argonne National Laboratory  
197 (Argonne, IL) where DNA was extracted from all rat feces samples stored at -20°C. Following  
198 the methods outlined by Denner, et al.<sup>16</sup>, primers specific for the V4 region of the created 16S  
199 rRNA encoding gene was used for PCR amplification. These amplicons were then quantified  
200 using the Illumina MiSeq (Illumina, San Diego, CA) at the Argonne National Laboratory. Once  
201 quantified, amplicons were sequenced using customized sequencing primers to process for  
202 operational taxonomic unity (OTU) picking.<sup>16</sup> Subsequent analysis was then completed by using  
203 QiiME2<sup>17</sup> which was able to produce taxonomic profiles and metadata files. These files were  
204 then analyzed through METAGENassist to produce relative abundance tables of genera,

205 heatmaps of total taxonomic ranks, and Partial Least Squares Discriminant Analysis (PLSDA)  
206 plots.<sup>18</sup>

207 **Table S1.** Method Detection Limit (MDL) for each PCB congener or co-eluted congeners. MDL was  
 208 determined from method blanks analyzed in parallel with samples and expressed as the upper limit of  
 209 99% confidence interval of method blanks (average +  $t_{n-1}$ \* standard deviation,  $t_{n-1}$  is Student's t-value of  
 210 99% confidence level with n-1 degree of freedom). Values are expressed in ng.

| PCB             | MDL   | PCB                  | MDL   | PCB                | MDL   | PCB            | MDL   |
|-----------------|-------|----------------------|-------|--------------------|-------|----------------|-------|
| <b>1</b>        | 0.024 | <b>51</b>            | 0.007 | <b>106</b>         | 0.002 | <b>161</b>     | 0.002 |
| <b>2</b>        | 0.031 | <b>52</b>            | 0.177 | <b>107</b>         | 0.004 | <b>162</b>     | 0.017 |
| <b>3</b>        | 0.051 | <b>54</b>            | 0.002 | <b>108/124</b>     | 0.003 | <b>164</b>     | 0.002 |
| <b>4</b>        | 0.062 | <b>55</b>            | 0.007 | <b>110</b>         | 0.129 | <b>165</b>     | 0.002 |
| <b>5</b>        | 0.008 | <b>56</b>            | 0.032 | <b>111</b>         | 0.002 | <b>167</b>     | 0.018 |
| <b>6</b>        | 0.024 | <b>57</b>            | 0.003 | <b>112</b>         | 0.001 | <b>169</b>     | 0.003 |
| <b>7</b>        | 0.010 | <b>58</b>            | 0.001 | <b>114</b>         | 0.068 | <b>170</b>     | 0.008 |
| <b>8</b>        | 0.047 | <b>59/62/75</b>      | 0.022 | <b>115</b>         | 0.106 | <b>171/173</b> | 0.008 |
| <b>9</b>        | 0.007 | <b>60</b>            | 0.021 | <b>117</b>         | 0.269 | <b>172</b>     | 0.012 |
| <b>10</b>       | 0.014 | <b>61/70/74/76</b>   | 0.241 | <b>118</b>         | 0.089 | <b>174</b>     | 0.008 |
| <b>11</b>       | 0.109 | <b>63</b>            | 0.006 | <b>120</b>         | 0.002 | <b>175</b>     | 0.008 |
| <b>12/13</b>    | 0.061 | <b>64</b>            | 0.045 | <b>121</b>         | 0.001 | <b>176</b>     | 0.002 |
| <b>15</b>       | 0.044 | <b>66</b>            | 0.116 | <b>122</b>         | 0.003 | <b>177</b>     | 0.007 |
| <b>16</b>       | 0.044 | <b>67</b>            | 0.004 | <b>123</b>         | 0.002 | <b>178</b>     | 0.005 |
| <b>17</b>       | 0.033 | <b>68</b>            | 0.086 | <b>126</b>         | 0.002 | <b>179</b>     | 0.005 |
| <b>18/30</b>    | 0.057 | <b>72</b>            | 0.008 | <b>127</b>         | 0.002 | <b>180/193</b> | 0.012 |
| <b>19</b>       | 0.018 | <b>73</b>            | 0.023 | <b>129/138/163</b> | 0.062 | <b>181</b>     | 0.028 |
| <b>20/28</b>    | 0.081 | <b>77</b>            | 0.006 | <b>130</b>         | 0.003 | <b>182</b>     | 0.058 |
| <b>21/33</b>    | 0.041 | <b>78</b>            | 0.006 | <b>131</b>         | 0.003 | <b>183</b>     | 0.006 |
| <b>22</b>       | 0.024 | <b>79</b>            | 0.001 | <b>132</b>         | 0.016 | <b>184</b>     | 0.069 |
| <b>23</b>       | 0.011 | <b>80</b>            | 0.001 | <b>133</b>         | 0.004 | <b>185</b>     | 0.007 |
| <b>24</b>       | 0.008 | <b>81</b>            | 0.002 | <b>134</b>         | 0.004 | <b>186</b>     | 0.003 |
| <b>25</b>       | 0.017 | <b>82</b>            | 0.017 | <b>135/151</b>     | 0.021 | <b>187</b>     | 0.018 |
| <b>26/29</b>    | 0.043 | <b>83</b>            | 0.007 | <b>136</b>         | 0.015 | <b>188</b>     | 0.034 |
| <b>27</b>       | 0.030 | <b>84</b>            | 0.052 | <b>137</b>         | 0.003 | <b>189</b>     | 0.009 |
| <b>31</b>       | 0.057 | <b>85/116</b>        | 0.081 | <b>139/140</b>     | 0.002 | <b>190</b>     | 0.018 |
| <b>32</b>       | 0.026 | <b>86/97/109/119</b> | 0.051 | <b>141</b>         | 0.008 | <b>191</b>     | 0.007 |
| <b>34</b>       | 0.017 | <b>87/125</b>        | 0.060 | <b>142</b>         | 0.003 | <b>192</b>     | 0.007 |
| <b>35</b>       | 0.004 | <b>88</b>            | 0.004 | <b>143</b>         | 0.003 | <b>194</b>     | 0.010 |
| <b>36</b>       | 0.004 | <b>89</b>            | 0.002 | <b>144</b>         | 0.002 | <b>195</b>     | 0.006 |
| <b>37</b>       | 0.020 | <b>90/101/113</b>    | 0.137 | <b>145</b>         | 0.002 | <b>196</b>     | 0.004 |
| <b>38</b>       | 0.007 | <b>91</b>            | 0.015 | <b>146</b>         | 0.004 | <b>197</b>     | 0.028 |
| <b>39</b>       | 0.003 | <b>92</b>            | 0.032 | <b>147/149</b>     | 0.060 | <b>198/199</b> | 0.007 |
| <b>40/71</b>    | 0.053 | <b>93/100</b>        | 0.003 | <b>148</b>         | 0.003 | <b>200</b>     | 0.017 |
| <b>41</b>       | 0.006 | <b>94</b>            | 0.002 | <b>150</b>         | 0.002 | <b>201</b>     | 0.003 |
| <b>42</b>       | 0.022 | <b>95</b>            | 0.123 | <b>152</b>         | 0.002 | <b>202</b>     | 0.028 |
| <b>43</b>       | 0.004 | <b>96</b>            | 0.002 | <b>153/168</b>     | 0.047 | <b>203</b>     | 0.002 |
| <b>44/47/65</b> | 0.290 | <b>98</b>            | 0.002 | <b>154</b>         | 0.002 | <b>205</b>     | 0.004 |
| <b>45</b>       | 0.005 | <b>99</b>            | 0.058 | <b>155</b>         | 0.002 | <b>206</b>     | 0.078 |
| <b>46</b>       | 0.056 | <b>102</b>           | 0.003 | <b>156/157</b>     | 0.008 | <b>207</b>     | 0.013 |
| <b>48</b>       | 0.016 | <b>103</b>           | 0.002 | <b>158</b>         | 0.002 | <b>208</b>     | 0.008 |
| <b>49/69</b>    | 0.077 | <b>104</b>           | 0.002 | <b>159</b>         | 0.013 | <b>209</b>     | 0.086 |
| <b>50/53</b>    | 0.063 | <b>105</b>           | 0.035 | <b>160</b>         | 0.002 |                |       |

211 **Table S2.** Recovery rate (%) of surrogate standards (PCB 14, d-PCB 65, and PCB 166) in tissues and  
 212 SAM vapor extraction. Values are expressed as mean  $\pm$  standard deviation.

|          | Liver<br>(n = 15) | Lung<br>(n = 20) | Brain<br>(n = 14) | Adipose<br>(n = 19) | Serum<br>(n = 19) | SAM vapor<br>(n = 13) |
|----------|-------------------|------------------|-------------------|---------------------|-------------------|-----------------------|
| PCB 14   | 87 $\pm$ 9        | 85 $\pm$ 7       | 86 $\pm$ 8        | 91 $\pm$ 13         | 82 $\pm$ 11       | 81 $\pm$ 10           |
| d-PCB 65 | 93 $\pm$ 11       | 93 $\pm$ 7       | 91 $\pm$ 9        | 75 $\pm$ 23         | 101 $\pm$ 13      | 62 $\pm$ 10           |
| PCB 166  | 105 $\pm$ 11      | 101 $\pm$ 7      | 101 $\pm$ 6       | 83 $\pm$ 20         | 108 $\pm$ 15      | 63 $\pm$ 14           |

213

214 **Table S3.1** Average PCB congener concentrations in **liver** of SAM-exposure group. Values are expressed  
 215 in ng/g wet tissue weight.

| PCB             | Conc. | PCB                  | Conc. | PCB                | Conc. | PCB            | Conc. |
|-----------------|-------|----------------------|-------|--------------------|-------|----------------|-------|
| <b>1</b>        | 0.03  | <b>51</b>            | 0.01  | <b>107</b>         | 0.25  | <b>162</b>     | 0.02  |
| <b>2</b>        | 0.04  | <b>52</b>            | 1.86  | <b>108/124</b>     | 0.01  | <b>164</b>     | 0.02  |
| <b>3</b>        | 0.06  | <b>54</b>            | 0.00  | <b>110</b>         | 1.86  | <b>165</b>     | 0.00  |
| <b>4</b>        | 0.07  | <b>55</b>            | 0.11  | <b>111</b>         | 0.00  | <b>167</b>     | 0.02  |
| <b>5</b>        | 0.01  | <b>56</b>            | 0.06  | <b>112</b>         | 0.05  | <b>169</b>     | 0.01  |
| <b>6</b>        | 0.03  | <b>57</b>            | 0.00  | <b>114</b>         | 0.22  | <b>170</b>     | 0.02  |
| <b>7</b>        | 0.01  | <b>58</b>            | 0.00  | <b>115</b>         | 0.76  | <b>171/173</b> | 0.02  |
| <b>8</b>        | 0.06  | <b>59/62/75</b>      | 0.12  | <b>117</b>         | 0.62  | <b>172</b>     | 0.02  |
| <b>9</b>        | 0.01  | <b>60</b>            | 2.40  | <b>118</b>         | 4.84  | <b>174</b>     | 0.03  |
| <b>10</b>       | 0.02  | <b>61/70/74/76</b>   | 9.10  | <b>120</b>         | 0.00  | <b>175</b>     | 0.02  |
| <b>11</b>       | 0.13  | <b>63</b>            | 0.14  | <b>121</b>         | 0.00  | <b>176</b>     | 0.00  |
| <b>12/13</b>    | 0.07  | <b>64</b>            | 0.21  | <b>122</b>         | 0.01  | <b>177</b>     | 0.02  |
| <b>14</b>       | 0.00  | <b>66</b>            | 12.1  | <b>123</b>         | 0.14  | <b>178</b>     | 0.01  |
| <b>15</b>       | 0.06  | <b>67</b>            | 0.01  | <b>126</b>         | 0.00  | <b>179</b>     | 0.01  |
| <b>16</b>       | 0.15  | <b>68</b>            | 0.10  | <b>127</b>         | 0.00  | <b>180/193</b> | 0.06  |
| <b>17</b>       | 0.04  | <b>72</b>            | 0.01  | <b>128/166</b>     | 0.00  | <b>181</b>     | 0.03  |
| <b>18/30</b>    | 0.22  | <b>73</b>            | 0.04  | <b>129/138/163</b> | 1.26  | <b>182</b>     | 0.07  |
| <b>19</b>       | 0.15  | <b>77</b>            | 0.03  | <b>130</b>         | 0.08  | <b>183</b>     | 0.05  |
| <b>20/28</b>    | 0.68  | <b>78</b>            | 0.01  | <b>131</b>         | 0.00  | <b>184</b>     | 0.08  |
| <b>21/33</b>    | 0.22  | <b>79</b>            | 0.01  | <b>132</b>         | 0.08  | <b>185</b>     | 0.01  |
| <b>22</b>       | 0.15  | <b>80</b>            | 0.02  | <b>133</b>         | 0.01  | <b>186</b>     | 0.00  |
| <b>23</b>       | 0.03  | <b>81</b>            | 0.01  | <b>134</b>         | 0.00  | <b>187</b>     | 0.08  |
| <b>24</b>       | 0.11  | <b>82</b>            | 0.10  | <b>135/151</b>     | 0.05  | <b>188</b>     | 0.04  |
| <b>25</b>       | 0.05  | <b>83</b>            | 0.02  | <b>136</b>         | 0.02  | <b>189</b>     | 0.01  |
| <b>26/29</b>    | 0.10  | <b>84</b>            | 0.06  | <b>137</b>         | 0.12  | <b>190</b>     | 0.03  |
| <b>27</b>       | 0.04  | <b>85/116</b>        | 3.81  | <b>139/140</b>     | 0.14  | <b>191</b>     | 0.02  |
| <b>31</b>       | 0.23  | <b>86/97/109/119</b> | 1.09  | <b>141</b>         | 0.05  | <b>192</b>     | 0.02  |
| <b>32</b>       | 0.26  | <b>87/125</b>        | 1.08  | <b>142</b>         | 0.00  | <b>194</b>     | 0.02  |
| <b>34</b>       | 0.09  | <b>88</b>            | 0.02  | <b>143</b>         | 0.00  | <b>195</b>     | 0.01  |
| <b>35</b>       | 0.04  | <b>89</b>            | 0.00  | <b>144</b>         | 0.01  | <b>196</b>     | 0.01  |
| <b>36</b>       | 0.01  | <b>90/101/113</b>    | 6.51  | <b>145</b>         | 0.00  | <b>197</b>     | 0.04  |
| <b>37</b>       | 0.02  | <b>91</b>            | 0.12  | <b>146</b>         | 0.16  | <b>198/199</b> | 0.02  |
| <b>38</b>       | 0.06  | <b>92</b>            | 0.85  | <b>147/149</b>     | 0.40  | <b>200</b>     | 0.02  |
| <b>39</b>       | 0.01  | <b>93/100</b>        | 0.04  | <b>148</b>         | 0.00  | <b>201</b>     | 0.00  |
| <b>40/71</b>    | 0.06  | <b>94</b>            | 0.00  | <b>150</b>         | 0.00  | <b>202</b>     | 0.03  |
| <b>41</b>       | 0.01  | <b>95</b>            | 0.51  | <b>152</b>         | 0.00  | <b>203</b>     | 0.01  |
| <b>42</b>       | 0.07  | <b>96</b>            | 0.00  | <b>153/168</b>     | 1.08  | <b>204</b>     | 0.00  |
| <b>43</b>       | 0.01  | <b>98</b>            | 0.00  | <b>154</b>         | 0.04  | <b>205</b>     | 0.01  |
| <b>44/47/65</b> | 1.94  | <b>99</b>            | 15.0  | <b>155</b>         | 0.00  | <b>206</b>     | 0.09  |
| <b>45</b>       | 0.01  | <b>102</b>           | 0.01  | <b>156/157</b>     | 0.01  | <b>207</b>     | 0.02  |
| <b>46</b>       | 0.07  | <b>103</b>           | 0.00  | <b>158</b>         | 0.15  | <b>208</b>     | 0.01  |
| <b>48</b>       | 0.05  | <b>104</b>           | 0.00  | <b>159</b>         | 0.02  | <b>209</b>     | 0.10  |
| <b>49/69</b>    | 2.08  | <b>105</b>           | 1.81  | <b>160</b>         | 0.00  | <b>SUM</b>     | 78.6  |
| <b>50/53</b>    | 0.08  | <b>106</b>           | 0.01  | <b>161</b>         | 0.00  |                |       |

217 **Table S3.2** Average lipid-adjusted PCB congener concentrations in **liver** of SAM-exposure group.  
 218 Values are expressed in ng/g lipid weight.

| PCB             | Conc. | PCB                  | Conc. | PCB                | Conc. | PCB            | Conc. |
|-----------------|-------|----------------------|-------|--------------------|-------|----------------|-------|
| <b>1</b>        | 0.47  | <b>51</b>            | 0.14  | <b>107</b>         | 4.15  | <b>162</b>     | 0.33  |
| <b>2</b>        | 0.61  | <b>52</b>            | 30.6  | <b>108/124</b>     | 0.10  | <b>164</b>     | 0.26  |
| <b>3</b>        | 1.01  | <b>54</b>            | 0.05  | <b>110</b>         | 30.2  | <b>165</b>     | 0.03  |
| <b>4</b>        | 1.22  | <b>55</b>            | 1.78  | <b>111</b>         | 0.04  | <b>167</b>     | 0.35  |
| <b>5</b>        | 0.15  | <b>56</b>            | 1.02  | <b>112</b>         | 0.80  | <b>169</b>     | 0.16  |
| <b>6</b>        | 0.48  | <b>57</b>            | 0.05  | <b>114</b>         | 3.57  | <b>170</b>     | 0.35  |
| <b>7</b>        | 0.20  | <b>58</b>            | 0.03  | <b>115</b>         | 12.5  | <b>171/173</b> | 0.36  |
| <b>8</b>        | 0.94  | <b>59/62/75</b>      | 1.89  | <b>117</b>         | 10.1  | <b>172</b>     | 0.38  |
| <b>9</b>        | 0.14  | <b>60</b>            | 39.4  | <b>118</b>         | 79.2  | <b>174</b>     | 0.44  |
| <b>10</b>       | 0.28  | <b>61/70/74/76</b>   | 149   | <b>120</b>         | 0.06  | <b>175</b>     | 0.36  |
| <b>11</b>       | 2.15  | <b>63</b>            | 2.24  | <b>121</b>         | 0.03  | <b>176</b>     | 0.05  |
| <b>12/13</b>    | 1.20  | <b>64</b>            | 3.49  | <b>122</b>         | 0.19  | <b>177</b>     | 0.37  |
| <b>14</b>       | 0.00  | <b>66</b>            | 198   | <b>123</b>         | 2.26  | <b>178</b>     | 0.10  |
| <b>15</b>       | 0.92  | <b>67</b>            | 0.09  | <b>126</b>         | 0.05  | <b>179</b>     | 0.13  |
| <b>16</b>       | 2.49  | <b>68</b>            | 1.71  | <b>127</b>         | 0.05  | <b>180/193</b> | 1.05  |
| <b>17</b>       | 0.65  | <b>72</b>            | 0.15  | <b>128/166</b>     | 0.00  | <b>181</b>     | 0.56  |
| <b>18/30</b>    | 3.74  | <b>73</b>            | 0.72  | <b>129/138/163</b> | 20.5  | <b>182</b>     | 1.14  |
| <b>19</b>       | 2.33  | <b>77</b>            | 0.51  | <b>130</b>         | 1.23  | <b>183</b>     | 0.83  |
| <b>20/28</b>    | 11.4  | <b>78</b>            | 0.17  | <b>131</b>         | 0.06  | <b>184</b>     | 1.36  |
| <b>21/33</b>    | 3.45  | <b>79</b>            | 0.19  | <b>132</b>         | 1.40  | <b>185</b>     | 0.21  |
| <b>22</b>       | 2.53  | <b>80</b>            | 0.33  | <b>133</b>         | 0.14  | <b>186</b>     | 0.06  |
| <b>23</b>       | 0.47  | <b>81</b>            | 0.20  | <b>134</b>         | 0.07  | <b>187</b>     | 1.30  |
| <b>24</b>       | 1.93  | <b>82</b>            | 1.70  | <b>135/151</b>     | 0.88  | <b>188</b>     | 0.67  |
| <b>25</b>       | 0.77  | <b>83</b>            | 0.29  | <b>136</b>         | 0.34  | <b>189</b>     | 0.20  |
| <b>26/29</b>    | 1.67  | <b>84</b>            | 1.02  | <b>137</b>         | 1.97  | <b>190</b>     | 0.48  |
| <b>27</b>       | 0.69  | <b>85/116</b>        | 62.2  | <b>139/140</b>     | 2.33  | <b>191</b>     | 0.25  |
| <b>31</b>       | 3.73  | <b>86/97/109/119</b> | 17.8  | <b>141</b>         | 0.86  | <b>192</b>     | 0.28  |
| <b>32</b>       | 4.25  | <b>87/125</b>        | 17.7  | <b>142</b>         | 0.06  | <b>194</b>     | 0.29  |
| <b>34</b>       | 1.43  | <b>88</b>            | 0.34  | <b>143</b>         | 0.05  | <b>195</b>     | 0.14  |
| <b>35</b>       | 0.60  | <b>89</b>            | 0.05  | <b>144</b>         | 0.17  | <b>196</b>     | 0.12  |
| <b>36</b>       | 0.20  | <b>90/101/113</b>    | 107   | <b>145</b>         | 0.03  | <b>197</b>     | 0.68  |
| <b>37</b>       | 0.39  | <b>91</b>            | 1.99  | <b>146</b>         | 2.64  | <b>198/199</b> | 0.30  |
| <b>38</b>       | 1.05  | <b>92</b>            | 14.0  | <b>147/149</b>     | 6.63  | <b>200</b>     | 0.37  |
| <b>39</b>       | 0.13  | <b>93/100</b>        | 0.63  | <b>148</b>         | 0.05  | <b>201</b>     | 0.07  |
| <b>40/71</b>    | 1.06  | <b>94</b>            | 0.05  | <b>150</b>         | 0.03  | <b>202</b>     | 0.55  |
| <b>41</b>       | 0.13  | <b>95</b>            | 8.37  | <b>152</b>         | 0.03  | <b>203</b>     | 0.18  |
| <b>42</b>       | 1.09  | <b>96</b>            | 0.05  | <b>153/168</b>     | 17.6  | <b>204</b>     | 0.00  |
| <b>43</b>       | 0.17  | <b>98</b>            | 0.04  | <b>154</b>         | 0.60  | <b>205</b>     | 0.16  |
| <b>44/47/65</b> | 31.8  | <b>99</b>            | 245   | <b>155</b>         | 0.03  | <b>206</b>     | 1.55  |
| <b>45</b>       | 0.12  | <b>102</b>           | 0.10  | <b>156/157</b>     | 0.17  | <b>207</b>     | 0.26  |
| <b>46</b>       | 1.10  | <b>103</b>           | 0.05  | <b>158</b>         | 2.45  | <b>208</b>     | 0.17  |
| <b>48</b>       | 0.84  | <b>104</b>           | 0.03  | <b>159</b>         | 0.26  | <b>209</b>     | 1.69  |
| <b>49/69</b>    | 34.1  | <b>105</b>           | 29.7  | <b>160</b>         | 0.06  | <b>SUM</b>     | 1290  |
| <b>50/53</b>    | 1.25  | <b>106</b>           | 0.12  | <b>161</b>         | 0.03  |                |       |

219



220 **Table S3.3** Average PCB congener concentrations in **lung** of SAM-exposure group. Values are expressed  
 221 in ng/g wet tissue weight.

| PCB             | Conc. | PCB                  | Conc. | PCB                | Conc. | PCB            | Conc. |
|-----------------|-------|----------------------|-------|--------------------|-------|----------------|-------|
| <b>1</b>        | 0.08  | <b>51</b>            | 0.02  | <b>107</b>         | 0.42  | <b>162</b>     | 0.05  |
| <b>2</b>        | 0.10  | <b>52</b>            | 3.15  | <b>108/124</b>     | 0.02  | <b>164</b>     | 0.01  |
| <b>3</b>        | 0.16  | <b>54</b>            | 0.01  | <b>110</b>         | 2.29  | <b>165</b>     | 0.01  |
| <b>4</b>        | 0.20  | <b>55</b>            | 0.08  | <b>111</b>         | 0.01  | <b>167</b>     | 0.06  |
| <b>5</b>        | 0.02  | <b>56</b>            | 0.24  | <b>112</b>         | 0.07  | <b>169</b>     | 0.01  |
| <b>6</b>        | 0.08  | <b>57</b>            | 0.01  | <b>114</b>         | 0.28  | <b>170</b>     | 0.03  |
| <b>7</b>        | 0.03  | <b>58</b>            | 0.00  | <b>115</b>         | 1.14  | <b>171/173</b> | 0.03  |
| <b>8</b>        | 0.15  | <b>59/62/75</b>      | 0.16  | <b>117</b>         | 1.11  | <b>172</b>     | 0.04  |
| <b>9</b>        | 0.02  | <b>60</b>            | 7.91  | <b>118</b>         | 8.64  | <b>174</b>     | 0.03  |
| <b>10</b>       | 0.05  | <b>61/70/74/76</b>   | 14.5  | <b>120</b>         | 0.01  | <b>175</b>     | 0.02  |
| <b>11</b>       | 0.35  | <b>63</b>            | 0.18  | <b>121</b>         | 0.00  | <b>176</b>     | 0.01  |
| <b>12/13</b>    | 0.20  | <b>64</b>            | 0.26  | <b>122</b>         | 0.02  | <b>177</b>     | 0.03  |
| <b>14</b>       | 0.00  | <b>66</b>            | 22.2  | <b>123</b>         | 0.18  | <b>178</b>     | 0.01  |
| <b>15</b>       | 0.14  | <b>67</b>            | 0.01  | <b>126</b>         | 0.01  | <b>179</b>     | 0.02  |
| <b>16</b>       | 0.14  | <b>68</b>            | 0.28  | <b>127</b>         | 0.01  | <b>180/193</b> | 0.10  |
| <b>17</b>       | 0.11  | <b>72</b>            | 0.02  | <b>128/166</b>     | 0.00  | <b>181</b>     | 0.09  |
| <b>18/30</b>    | 0.19  | <b>73</b>            | 0.07  | <b>129/138/163</b> | 3.65  | <b>182</b>     | 0.19  |
| <b>19</b>       | 0.06  | <b>77</b>            | 0.02  | <b>130</b>         | 0.12  | <b>183</b>     | 0.09  |
| <b>20/28</b>    | 2.07  | <b>78</b>            | 0.02  | <b>131</b>         | 0.01  | <b>184</b>     | 0.22  |
| <b>21/33</b>    | 0.13  | <b>79</b>            | 0.00  | <b>132</b>         | 0.09  | <b>185</b>     | 0.02  |
| <b>22</b>       | 0.08  | <b>80</b>            | 0.00  | <b>133</b>         | 0.01  | <b>186</b>     | 0.01  |
| <b>23</b>       | 0.04  | <b>81</b>            | 0.01  | <b>134</b>         | 0.01  | <b>187</b>     | 0.14  |
| <b>24</b>       | 0.03  | <b>82</b>            | 0.25  | <b>135/151</b>     | 0.10  | <b>188</b>     | 0.11  |
| <b>25</b>       | 0.05  | <b>83</b>            | 0.02  | <b>136</b>         | 0.05  | <b>189</b>     | 0.03  |
| <b>26/29</b>    | 0.14  | <b>84</b>            | 0.17  | <b>137</b>         | 0.19  | <b>190</b>     | 0.06  |
| <b>27</b>       | 0.10  | <b>85/116</b>        | 6.74  | <b>139/140</b>     | 0.19  | <b>191</b>     | 0.02  |
| <b>31</b>       | 0.18  | <b>86/97/109/119</b> | 1.97  | <b>141</b>         | 0.07  | <b>192</b>     | 0.02  |
| <b>32</b>       | 0.08  | <b>87/125</b>        | 2.04  | <b>142</b>         | 0.01  | <b>194</b>     | 0.03  |
| <b>34</b>       | 0.05  | <b>88</b>            | 0.01  | <b>143</b>         | 0.01  | <b>195</b>     | 0.02  |
| <b>35</b>       | 0.01  | <b>89</b>            | 0.01  | <b>144</b>         | 0.01  | <b>196</b>     | 0.01  |
| <b>36</b>       | 0.01  | <b>90/101/113</b>    | 11.9  | <b>145</b>         | 0.01  | <b>197</b>     | 0.10  |
| <b>37</b>       | 0.06  | <b>91</b>            | 0.11  | <b>146</b>         | 0.37  | <b>198/199</b> | 0.02  |
| <b>38</b>       | 0.02  | <b>92</b>            | 1.54  | <b>147/149</b>     | 0.62  | <b>200</b>     | 0.05  |
| <b>39</b>       | 0.01  | <b>93/100</b>        | 0.02  | <b>148</b>         | 0.01  | <b>201</b>     | 0.01  |
| <b>40/71</b>    | 0.17  | <b>94</b>            | 0.01  | <b>150</b>         | 0.01  | <b>202</b>     | 0.09  |
| <b>41</b>       | 0.02  | <b>95</b>            | 1.18  | <b>152</b>         | 0.01  | <b>203</b>     | 0.01  |
| <b>42</b>       | 0.08  | <b>96</b>            | 0.01  | <b>153/168</b>     | 2.90  | <b>204</b>     | 0.00  |
| <b>43</b>       | 0.02  | <b>98</b>            | 0.01  | <b>154</b>         | 0.07  | <b>205</b>     | 0.01  |
| <b>44/47/65</b> | 3.76  | <b>99</b>            | 32.0  | <b>155</b>         | 0.01  | <b>206</b>     | 0.25  |
| <b>45</b>       | 0.02  | <b>102</b>           | 0.01  | <b>156/157</b>     | 0.03  | <b>207</b>     | 0.04  |
| <b>46</b>       | 0.18  | <b>103</b>           | 0.01  | <b>158</b>         | 0.29  | <b>208</b>     | 0.03  |
| <b>48</b>       | 0.07  | <b>104</b>           | 0.01  | <b>159</b>         | 0.04  | <b>209</b>     | 0.28  |
| <b>49/69</b>    | 1.31  | <b>105</b>           | 5.30  | <b>160</b>         | 0.01  | <b>SUM</b>     | 149   |
| <b>50/53</b>    | 0.20  | <b>106</b>           | 0.01  | <b>161</b>         | 0.01  |                |       |

223 **Table S3.4** Average lipid-adjusted PCB congener concentrations in **lung** of SAM-exposure group. Values  
 224 are expressed in ng/g lipid weight.

| PCB             | Conc. | PCB                  | Conc. | PCB                | Conc. | PCB            | Conc. |
|-----------------|-------|----------------------|-------|--------------------|-------|----------------|-------|
| <b>1</b>        | 1.76  | <b>51</b>            | 0.51  | <b>107</b>         | 9.66  | <b>162</b>     | 1.25  |
| <b>2</b>        | 2.32  | <b>52</b>            | 72.1  | <b>108/124</b>     | 0.48  | <b>164</b>     | 0.24  |
| <b>3</b>        | 3.80  | <b>54</b>            | 0.17  | <b>110</b>         | 52.5  | <b>165</b>     | 0.13  |
| <b>4</b>        | 4.61  | <b>55</b>            | 1.96  | <b>111</b>         | 0.15  | <b>167</b>     | 1.33  |
| <b>5</b>        | 0.56  | <b>56</b>            | 5.69  | <b>112</b>         | 1.73  | <b>169</b>     | 0.26  |
| <b>6</b>        | 1.80  | <b>57</b>            | 0.19  | <b>114</b>         | 6.32  | <b>170</b>     | 0.60  |
| <b>7</b>        | 0.77  | <b>58</b>            | 0.09  | <b>115</b>         | 25.9  | <b>171/173</b> | 0.70  |
| <b>8</b>        | 3.53  | <b>59/62/75</b>      | 3.58  | <b>117</b>         | 25.4  | <b>172</b>     | 0.86  |
| <b>9</b>        | 0.54  | <b>60</b>            | 183   | <b>118</b>         | 198   | <b>174</b>     | 0.65  |
| <b>10</b>       | 1.06  | <b>61/70/74/76</b>   | 332   | <b>120</b>         | 0.16  | <b>175</b>     | 0.56  |
| <b>11</b>       | 8.12  | <b>63</b>            | 4.22  | <b>121</b>         | 0.10  | <b>176</b>     | 0.18  |
| <b>12/13</b>    | 4.53  | <b>64</b>            | 5.93  | <b>122</b>         | 0.43  | <b>177</b>     | 0.77  |
| <b>14</b>       | 0.00  | <b>66</b>            | 509   | <b>123</b>         | 4.11  | <b>178</b>     | 0.34  |
| <b>15</b>       | 3.25  | <b>67</b>            | 0.30  | <b>126</b>         | 0.18  | <b>179</b>     | 0.38  |
| <b>16</b>       | 3.32  | <b>68</b>            | 6.44  | <b>127</b>         | 0.14  | <b>180/193</b> | 2.19  |
| <b>17</b>       | 2.45  | <b>72</b>            | 0.58  | <b>128/166</b>     | 0.00  | <b>181</b>     | 2.13  |
| <b>18/30</b>    | 4.29  | <b>73</b>            | 1.72  | <b>129/138/163</b> | 84.1  | <b>182</b>     | 4.30  |
| <b>19</b>       | 1.33  | <b>77</b>            | 0.47  | <b>130</b>         | 2.79  | <b>183</b>     | 2.01  |
| <b>20/28</b>    | 47.7  | <b>78</b>            | 0.46  | <b>131</b>         | 0.22  | <b>184</b>     | 5.12  |
| <b>21/33</b>    | 3.04  | <b>79</b>            | 0.11  | <b>132</b>         | 2.05  | <b>185</b>     | 0.54  |
| <b>22</b>       | 1.79  | <b>80</b>            | 0.09  | <b>133</b>         | 0.30  | <b>186</b>     | 0.20  |
| <b>23</b>       | 0.83  | <b>81</b>            | 0.13  | <b>134</b>         | 0.27  | <b>187</b>     | 3.30  |
| <b>24</b>       | 0.58  | <b>82</b>            | 5.72  | <b>135/151</b>     | 2.36  | <b>188</b>     | 2.52  |
| <b>25</b>       | 1.24  | <b>83</b>            | 0.52  | <b>136</b>         | 1.15  | <b>189</b>     | 0.68  |
| <b>26/29</b>    | 3.18  | <b>84</b>            | 3.85  | <b>137</b>         | 4.43  | <b>190</b>     | 1.31  |
| <b>27</b>       | 2.23  | <b>85/116</b>        | 155   | <b>139/140</b>     | 4.38  | <b>191</b>     | 0.56  |
| <b>31</b>       | 4.25  | <b>86/97/109/119</b> | 45.3  | <b>141</b>         | 1.47  | <b>192</b>     | 0.49  |
| <b>32</b>       | 1.97  | <b>87/125</b>        | 46.8  | <b>142</b>         | 0.22  | <b>194</b>     | 0.77  |
| <b>34</b>       | 1.24  | <b>88</b>            | 0.26  | <b>143</b>         | 0.19  | <b>195</b>     | 0.47  |
| <b>35</b>       | 0.31  | <b>89</b>            | 0.18  | <b>144</b>         | 0.30  | <b>196</b>     | 0.33  |
| <b>36</b>       | 0.26  | <b>90/101/113</b>    | 272   | <b>145</b>         | 0.12  | <b>197</b>     | 2.37  |
| <b>37</b>       | 1.48  | <b>91</b>            | 2.53  | <b>146</b>         | 8.54  | <b>198/199</b> | 0.53  |
| <b>38</b>       | 0.51  | <b>92</b>            | 35.39 | <b>147/149</b>     | 14.1  | <b>200</b>     | 1.26  |
| <b>39</b>       | 0.24  | <b>93/100</b>        | 0.50  | <b>148</b>         | 0.19  | <b>201</b>     | 0.22  |
| <b>40/71</b>    | 3.99  | <b>94</b>            | 0.17  | <b>150</b>         | 0.12  | <b>202</b>     | 2.08  |
| <b>41</b>       | 0.43  | <b>95</b>            | 27.3  | <b>152</b>         | 0.13  | <b>203</b>     | 0.21  |
| <b>42</b>       | 1.90  | <b>96</b>            | 0.14  | <b>153/168</b>     | 66.6  | <b>204</b>     | 0.00  |
| <b>43</b>       | 0.35  | <b>98</b>            | 0.18  | <b>154</b>         | 1.64  | <b>205</b>     | 0.31  |
| <b>44/47/65</b> | 86.2  | <b>99</b>            | 734   | <b>155</b>         | 0.12  | <b>206</b>     | 5.84  |
| <b>45</b>       | 0.37  | <b>102</b>           | 0.24  | <b>156/157</b>     | 0.63  | <b>207</b>     | 0.97  |
| <b>46</b>       | 4.17  | <b>103</b>           | 0.20  | <b>158</b>         | 6.59  | <b>208</b>     | 0.61  |
| <b>48</b>       | 1.51  | <b>104</b>           | 0.14  | <b>159</b>         | 0.99  | <b>209</b>     | 6.39  |
| <b>49/69</b>    | 30.0  | <b>105</b>           | 122   | <b>160</b>         | 0.12  | <b>SUM</b>     | 3420  |
| <b>50/53</b>    | 4.72  | <b>106</b>           | 0.15  | <b>161</b>         | 0.13  |                |       |

226 **Table S3.5** Average PCB congener concentrations in **brain** of SAM-exposure group. Values are  
 227 expressed in ng/g wet tissue weight.

| PCB             | Conc. | PCB                  | Conc. | PCB                | Conc. | PCB            | Conc. |
|-----------------|-------|----------------------|-------|--------------------|-------|----------------|-------|
| <b>1</b>        | 0.03  | <b>51</b>            | 0.01  | <b>107</b>         | 0.25  | <b>162</b>     | 0.03  |
| <b>2</b>        | 0.04  | <b>52</b>            | 1.37  | <b>108/124</b>     | 0.04  | <b>164</b>     | 0.02  |
| <b>3</b>        | 0.07  | <b>54</b>            | 0.00  | <b>110</b>         | 1.59  | <b>165</b>     | 0.00  |
| <b>4</b>        | 0.13  | <b>55</b>            | 0.08  | <b>111</b>         | 0.00  | <b>167</b>     | 0.03  |
| <b>5</b>        | 0.01  | <b>56</b>            | 0.05  | <b>112</b>         | 0.12  | <b>169</b>     | 0.01  |
| <b>6</b>        | 0.04  | <b>57</b>            | 0.00  | <b>114</b>         | 0.25  | <b>170</b>     | 0.02  |
| <b>7</b>        | 0.02  | <b>58</b>            | 0.00  | <b>115</b>         | 0.55  | <b>171/173</b> | 0.02  |
| <b>8</b>        | 0.06  | <b>59/62/75</b>      | 0.12  | <b>117</b>         | 0.62  | <b>172</b>     | 0.03  |
| <b>9</b>        | 0.01  | <b>60</b>            | 2.05  | <b>118</b>         | 4.28  | <b>174</b>     | 0.01  |
| <b>10</b>       | 0.06  | <b>61/70/74/76</b>   | 9.00  | <b>120</b>         | 0.00  | <b>175</b>     | 0.12  |
| <b>11</b>       | 0.19  | <b>63</b>            | 0.13  | <b>121</b>         | 0.00  | <b>176</b>     | 0.00  |
| <b>12/13</b>    | 0.08  | <b>64</b>            | 0.19  | <b>122</b>         | 0.01  | <b>177</b>     | 0.01  |
| <b>14</b>       | 0.00  | <b>66</b>            | 10.5  | <b>123</b>         | 0.13  | <b>178</b>     | 0.02  |
| <b>15</b>       | 0.06  | <b>67</b>            | 0.01  | <b>126</b>         | 0.00  | <b>179</b>     | 0.01  |
| <b>16</b>       | 0.14  | <b>68</b>            | 0.12  | <b>127</b>         | 0.00  | <b>180/193</b> | 0.06  |
| <b>17</b>       | 0.04  | <b>72</b>            | 0.02  | <b>128/166</b>     | 0.00  | <b>181</b>     | 0.04  |
| <b>18/30</b>    | 0.21  | <b>73</b>            | 0.04  | <b>129/138/163</b> | 1.05  | <b>182</b>     | 0.13  |
| <b>19</b>       | 0.75  | <b>77</b>            | 0.01  | <b>130</b>         | 0.08  | <b>183</b>     | 0.06  |
| <b>20/28</b>    | 0.87  | <b>78</b>            | 0.01  | <b>131</b>         | 0.01  | <b>184</b>     | 0.09  |
| <b>21/33</b>    | 0.11  | <b>79</b>            | 0.00  | <b>132</b>         | 0.07  | <b>185</b>     | 0.02  |
| <b>22</b>       | 0.03  | <b>80</b>            | 0.00  | <b>133</b>         | 0.02  | <b>186</b>     | 0.00  |
| <b>23</b>       | 0.02  | <b>81</b>            | 0.00  | <b>134</b>         | 0.01  | <b>187</b>     | 0.11  |
| <b>24</b>       | 0.71  | <b>82</b>            | 0.09  | <b>135/151</b>     | 0.06  | <b>188</b>     | 0.05  |
| <b>25</b>       | 0.02  | <b>83</b>            | 0.08  | <b>136</b>         | 0.02  | <b>189</b>     | 0.08  |
| <b>26/29</b>    | 0.06  | <b>84</b>            | 0.08  | <b>137</b>         | 0.11  | <b>190</b>     | 0.04  |
| <b>27</b>       | 0.16  | <b>85/116</b>        | 3.09  | <b>139/140</b>     | 0.09  | <b>191</b>     | 0.01  |
| <b>31</b>       | 1.16  | <b>86/97/109/119</b> | 1.03  | <b>141</b>         | 0.05  | <b>192</b>     | 0.01  |
| <b>32</b>       | 0.04  | <b>87/125</b>        | 0.84  | <b>142</b>         | 0.00  | <b>194</b>     | 0.01  |
| <b>34</b>       | 0.20  | <b>88</b>            | 0.00  | <b>143</b>         | 0.00  | <b>195</b>     | 0.01  |
| <b>35</b>       | 0.04  | <b>89</b>            | 0.00  | <b>144</b>         | 0.01  | <b>196</b>     | 0.01  |
| <b>36</b>       | 0.00  | <b>90/101/113</b>    | 5.20  | <b>145</b>         | 0.00  | <b>197</b>     | 0.04  |
| <b>37</b>       | 0.03  | <b>91</b>            | 0.10  | <b>146</b>         | 0.17  | <b>198/199</b> | 0.02  |
| <b>38</b>       | 0.01  | <b>92</b>            | 0.76  | <b>147/149</b>     | 0.30  | <b>200</b>     | 0.03  |
| <b>39</b>       | 0.00  | <b>93/100</b>        | 0.03  | <b>148</b>         | 0.00  | <b>201</b>     | 0.01  |
| <b>40/71</b>    | 0.10  | <b>94</b>            | 0.00  | <b>150</b>         | 0.00  | <b>202</b>     | 0.04  |
| <b>41</b>       | 0.01  | <b>95</b>            | 0.44  | <b>152</b>         | 0.00  | <b>203</b>     | 0.01  |
| <b>42</b>       | 0.06  | <b>96</b>            | 0.00  | <b>153/168</b>     | 0.97  | <b>204</b>     | 0.00  |
| <b>43</b>       | 0.01  | <b>98</b>            | 0.00  | <b>154</b>         | 0.03  | <b>205</b>     | 0.01  |
| <b>44/47/65</b> | 1.68  | <b>99</b>            | 12.0  | <b>155</b>         | 0.00  | <b>206</b>     | 0.11  |
| <b>45</b>       | 0.01  | <b>102</b>           | 0.00  | <b>156/157</b>     | 0.01  | <b>207</b>     | 0.02  |
| <b>46</b>       | 0.08  | <b>103</b>           | 0.00  | <b>158</b>         | 0.12  | <b>208</b>     | 0.01  |
| <b>48</b>       | 0.05  | <b>104</b>           | 0.00  | <b>159</b>         | 0.02  | <b>209</b>     | 0.12  |
| <b>49/69</b>    | 0.59  | <b>105</b>           | 1.60  | <b>160</b>         | 0.00  | <b>SUM</b>     | 69.7  |
| <b>50/53</b>    | 0.09  | <b>106</b>           | 0.01  | <b>161</b>         | 0.00  |                |       |

229 **Table S3.6** Average lipid-adjusted PCB congener concentrations in **brain** of SAM-exposure group.  
 230 Values are expressed in ng/g lipid weight.

| PCB             | Conc. | PCB                  | Conc. | PCB                | Conc. | PCB            | Conc. |
|-----------------|-------|----------------------|-------|--------------------|-------|----------------|-------|
| <b>1</b>        | 0.35  | <b>51</b>            | 0.10  | <b>107</b>         | 2.69  | <b>162</b>     | 0.29  |
| <b>2</b>        | 0.46  | <b>52</b>            | 15.0  | <b>108/124</b>     | 0.50  | <b>164</b>     | 0.18  |
| <b>3</b>        | 0.76  | <b>54</b>            | 0.03  | <b>110</b>         | 17.4  | <b>165</b>     | 0.03  |
| <b>4</b>        | 1.47  | <b>55</b>            | 0.94  | <b>111</b>         | 0.03  | <b>167</b>     | 0.30  |
| <b>5</b>        | 0.15  | <b>56</b>            | 0.53  | <b>112</b>         | 1.28  | <b>169</b>     | 0.07  |
| <b>6</b>        | 0.47  | <b>57</b>            | 0.04  | <b>114</b>         | 2.70  | <b>170</b>     | 0.25  |
| <b>7</b>        | 0.18  | <b>58</b>            | 0.02  | <b>115</b>         | 5.93  | <b>171/173</b> | 0.19  |
| <b>8</b>        | 0.71  | <b>59/62/75</b>      | 1.27  | <b>117</b>         | 6.70  | <b>172</b>     | 0.37  |
| <b>9</b>        | 0.14  | <b>60</b>            | 22.3  | <b>118</b>         | 46.7  | <b>174</b>     | 0.16  |
| <b>10</b>       | 0.65  | <b>61/70/74/76</b>   | 98.3  | <b>120</b>         | 0.03  | <b>175</b>     | 1.25  |
| <b>11</b>       | 2.07  | <b>63</b>            | 1.43  | <b>121</b>         | 0.02  | <b>176</b>     | 0.04  |
| <b>12/13</b>    | 0.91  | <b>64</b>            | 2.09  | <b>122</b>         | 0.16  | <b>177</b>     | 0.15  |
| <b>14</b>       | 0.00  | <b>66</b>            | 115   | <b>123</b>         | 1.37  | <b>178</b>     | 0.19  |
| <b>15</b>       | 0.65  | <b>67</b>            | 0.06  | <b>126</b>         | 0.04  | <b>179</b>     | 0.08  |
| <b>16</b>       | 1.54  | <b>68</b>            | 1.29  | <b>127</b>         | 0.04  | <b>180/193</b> | 0.70  |
| <b>17</b>       | 0.49  | <b>72</b>            | 0.20  | <b>128/166</b>     | 0.00  | <b>181</b>     | 0.42  |
| <b>18/30</b>    | 2.25  | <b>73</b>            | 0.38  | <b>129/138/163</b> | 11.5  | <b>182</b>     | 1.43  |
| <b>19</b>       | 8.15  | <b>77</b>            | 0.09  | <b>130</b>         | 0.86  | <b>183</b>     | 0.60  |
| <b>20/28</b>    | 9.53  | <b>78</b>            | 0.09  | <b>131</b>         | 0.06  | <b>184</b>     | 1.02  |
| <b>21/33</b>    | 1.15  | <b>79</b>            | 0.02  | <b>132</b>         | 0.80  | <b>185</b>     | 0.17  |
| <b>22</b>       | 0.36  | <b>80</b>            | 0.04  | <b>133</b>         | 0.19  | <b>186</b>     | 0.04  |
| <b>23</b>       | 0.17  | <b>81</b>            | 0.03  | <b>134</b>         | 0.09  | <b>187</b>     | 1.22  |
| <b>24</b>       | 7.35  | <b>82</b>            | 1.02  | <b>135/151</b>     | 0.70  | <b>188</b>     | 0.50  |
| <b>25</b>       | 0.25  | <b>83</b>            | 0.92  | <b>136</b>         | 0.23  | <b>189</b>     | 0.92  |
| <b>26/29</b>    | 0.64  | <b>84</b>            | 0.86  | <b>137</b>         | 1.25  | <b>190</b>     | 0.42  |
| <b>27</b>       | 1.81  | <b>85/116</b>        | 33.7  | <b>139/140</b>     | 1.02  | <b>191</b>     | 0.16  |
| <b>31</b>       | 12.0  | <b>86/97/109/119</b> | 11.2  | <b>141</b>         | 0.59  | <b>192</b>     | 0.14  |
| <b>32</b>       | 0.39  | <b>87/125</b>        | 9.11  | <b>142</b>         | 0.05  | <b>194</b>     | 0.15  |
| <b>34</b>       | 2.27  | <b>88</b>            | 0.05  | <b>143</b>         | 0.04  | <b>195</b>     | 0.14  |
| <b>35</b>       | 0.38  | <b>89</b>            | 0.04  | <b>144</b>         | 0.15  | <b>196</b>     | 0.09  |
| <b>36</b>       | 0.05  | <b>90/101/113</b>    | 56.7  | <b>145</b>         | 0.03  | <b>197</b>     | 0.47  |
| <b>37</b>       | 0.30  | <b>91</b>            | 1.05  | <b>146</b>         | 1.84  | <b>198/199</b> | 0.24  |
| <b>38</b>       | 0.12  | <b>92</b>            | 8.31  | <b>147/149</b>     | 3.30  | <b>200</b>     | 0.31  |
| <b>39</b>       | 0.05  | <b>93/100</b>        | 0.37  | <b>148</b>         | 0.04  | <b>201</b>     | 0.10  |
| <b>40/71</b>    | 1.09  | <b>94</b>            | 0.03  | <b>150</b>         | 0.02  | <b>202</b>     | 0.42  |
| <b>41</b>       | 0.09  | <b>95</b>            | 4.85  | <b>152</b>         | 0.03  | <b>203</b>     | 0.07  |
| <b>42</b>       | 0.65  | <b>96</b>            | 0.03  | <b>153/168</b>     | 10.6  | <b>204</b>     | 0.00  |
| <b>43</b>       | 0.10  | <b>98</b>            | 0.03  | <b>154</b>         | 0.34  | <b>205</b>     | 0.06  |
| <b>44/47/65</b> | 18.3  | <b>99</b>            | 130   | <b>155</b>         | 0.02  | <b>206</b>     | 1.17  |
| <b>45</b>       | 0.09  | <b>102</b>           | 0.04  | <b>156/157</b>     | 0.13  | <b>207</b>     | 0.23  |
| <b>46</b>       | 0.83  | <b>103</b>           | 0.03  | <b>158</b>         | 1.35  | <b>208</b>     | 0.15  |
| <b>48</b>       | 0.54  | <b>104</b>           | 0.02  | <b>159</b>         | 0.20  | <b>209</b>     | 1.28  |
| <b>49/69</b>    | 6.42  | <b>105</b>           | 17.5  | <b>160</b>         | 0.04  | <b>SUM</b>     | 760   |
| <b>50/53</b>    | 0.94  | <b>106</b>           | 0.08  | <b>161</b>         | 0.03  |                |       |

232 **Table S3.7** Average PCB congener concentrations in **adipose tissue** of SAM-exposure group. Values are  
 233 expressed in ng/g wet tissue weight.

| PCB             | Conc. | PCB                  | Conc. | PCB                | Conc. | PCB            | Conc. |
|-----------------|-------|----------------------|-------|--------------------|-------|----------------|-------|
| <b>1</b>        | 0.06  | <b>51</b>            | 0.05  | <b>107</b>         | 12.5  | <b>162</b>     | 0.04  |
| <b>2</b>        | 0.07  | <b>52</b>            | 147   | <b>108/124</b>     | 0.77  | <b>164</b>     | 0.76  |
| <b>3</b>        | 0.12  | <b>54</b>            | 0.00  | <b>110</b>         | 130   | <b>165</b>     | 0.01  |
| <b>4</b>        | 0.15  | <b>55</b>            | 0.02  | <b>111</b>         | 0.01  | <b>167</b>     | 0.64  |
| <b>5</b>        | 0.02  | <b>56</b>            | 4.18  | <b>112</b>         | 0.00  | <b>169</b>     | 0.01  |
| <b>6</b>        | 0.13  | <b>57</b>            | 0.01  | <b>114</b>         | 7.79  | <b>170</b>     | 0.78  |
| <b>7</b>        | 0.06  | <b>58</b>            | 0.00  | <b>115</b>         | 24.9  | <b>171/173</b> | 0.66  |
| <b>8</b>        | 0.46  | <b>59/62/75</b>      | 6.13  | <b>117</b>         | 6.67  | <b>172</b>     | 0.21  |
| <b>9</b>        | 0.05  | <b>60</b>            | 129   | <b>118</b>         | 226   | <b>174</b>     | 0.40  |
| <b>10</b>       | 0.03  | <b>61/70/74/76</b>   | 585   | <b>120</b>         | 0.01  | <b>175</b>     | 0.06  |
| <b>11</b>       | 0.26  | <b>63</b>            | 9.46  | <b>121</b>         | 0.00  | <b>176</b>     | 0.03  |
| <b>12/13</b>    | 0.14  | <b>64</b>            | 16.1  | <b>122</b>         | 0.01  | <b>177</b>     | 0.99  |
| <b>14</b>       | 0.00  | <b>66</b>            | 738   | <b>123</b>         | 6.02  | <b>178</b>     | 0.27  |
| <b>15</b>       | 0.10  | <b>67</b>            | 0.08  | <b>126</b>         | 0.01  | <b>179</b>     | 0.04  |
| <b>16</b>       | 0.11  | <b>68</b>            | 0.21  | <b>127</b>         | 0.01  | <b>180/193</b> | 1.76  |
| <b>17</b>       | 0.16  | <b>72</b>            | 0.16  | <b>128/166</b>     | 0.00  | <b>181</b>     | 0.13  |
| <b>18/30</b>    | 1.14  | <b>73</b>            | 0.05  | <b>129/138/163</b> | 93.3  | <b>182</b>     | 0.09  |
| <b>19</b>       | 0.04  | <b>77</b>            | 0.01  | <b>130</b>         | 4.72  | <b>183</b>     | 1.38  |
| <b>20/28</b>    | 56.2  | <b>78</b>            | 0.01  | <b>131</b>         | 0.37  | <b>184</b>     | 0.09  |
| <b>21/33</b>    | 0.10  | <b>79</b>            | 0.01  | <b>132</b>         | 6.78  | <b>185</b>     | 0.02  |
| <b>22</b>       | 0.06  | <b>80</b>            | 0.00  | <b>133</b>         | 1.23  | <b>186</b>     | 0.01  |
| <b>23</b>       | 0.03  | <b>81</b>            | 0.00  | <b>134</b>         | 0.52  | <b>187</b>     | 1.60  |
| <b>24</b>       | 0.02  | <b>82</b>            | 9.14  | <b>135/151</b>     | 5.76  | <b>188</b>     | 0.08  |
| <b>25</b>       | 0.13  | <b>83</b>            | 0.02  | <b>136</b>         | 0.55  | <b>189</b>     | 0.02  |
| <b>26/29</b>    | 0.24  | <b>84</b>            | 3.34  | <b>137</b>         | 6.77  | <b>190</b>     | 0.14  |
| <b>27</b>       | 0.07  | <b>85/116</b>        | 187   | <b>139/140</b>     | 7.35  | <b>191</b>     | 0.05  |
| <b>31</b>       | 4.76  | <b>86/97/109/119</b> | 61.3  | <b>141</b>         | 3.95  | <b>192</b>     | 0.02  |
| <b>32</b>       | 0.35  | <b>87/125</b>        | 52.5  | <b>142</b>         | 0.01  | <b>194</b>     | 0.19  |
| <b>34</b>       | 0.04  | <b>88</b>            | 0.01  | <b>143</b>         | 0.02  | <b>195</b>     | 0.09  |
| <b>35</b>       | 0.01  | <b>89</b>            | 0.09  | <b>144</b>         | 1.38  | <b>196</b>     | 0.09  |
| <b>36</b>       | 0.01  | <b>90/101/113</b>    | 355   | <b>145</b>         | 0.01  | <b>197</b>     | 0.08  |
| <b>37</b>       | 0.62  | <b>91</b>            | 6.59  | <b>146</b>         | 11.0  | <b>198/199</b> | 0.29  |
| <b>38</b>       | 0.02  | <b>92</b>            | 57.9  | <b>147/149</b>     | 28.5  | <b>200</b>     | 0.04  |
| <b>39</b>       | 0.01  | <b>93/100</b>        | 1.88  | <b>148</b>         | 0.07  | <b>201</b>     | 0.05  |
| <b>40/71</b>    | 3.58  | <b>94</b>            | 0.04  | <b>150</b>         | 0.01  | <b>202</b>     | 0.22  |
| <b>41</b>       | 0.12  | <b>95</b>            | 28.3  | <b>152</b>         | 0.01  | <b>203</b>     | 0.15  |
| <b>42</b>       | 3.96  | <b>96</b>            | 0.02  | <b>153/168</b>     | 65.4  | <b>204</b>     | 0.00  |
| <b>43</b>       | 0.24  | <b>98</b>            | 0.03  | <b>154</b>         | 2.62  | <b>205</b>     | 0.01  |
| <b>44/47/65</b> | 126   | <b>99</b>            | 633   | <b>155</b>         | 0.01  | <b>206</b>     | 0.19  |
| <b>45</b>       | 0.23  | <b>102</b>           | 0.33  | <b>156/157</b>     | 1.87  | <b>207</b>     | 0.04  |
| <b>46</b>       | 0.13  | <b>103</b>           | 0.20  | <b>158</b>         | 10.5  | <b>208</b>     | 0.07  |
| <b>48</b>       | 2.50  | <b>104</b>           | 0.00  | <b>159</b>         | 0.03  | <b>209</b>     | 0.25  |
| <b>49/69</b>    | 49.6  | <b>105</b>           | 86.8  | <b>160</b>         | 0.09  | <b>SUM</b>     | 4050  |
| <b>50/53</b>    | 0.45  | <b>106</b>           | 0.01  | <b>161</b>         | 0.02  |                |       |

235 **Table S3.8** Average lipid-adjusted PCB congener concentrations in **adipose tissue** of SAM-exposure  
 236 group. Values are expressed in ng/g lipid weight.

| PCB             | Conc. | PCB                  | Conc. | PCB                | Conc. | PCB            | Conc. |
|-----------------|-------|----------------------|-------|--------------------|-------|----------------|-------|
| <b>1</b>        | 0.07  | <b>51</b>            | 0.06  | <b>107</b>         | 15.8  | <b>162</b>     | 0.05  |
| <b>2</b>        | 0.09  | <b>52</b>            | 184   | <b>108/124</b>     | 0.96  | <b>164</b>     | 0.95  |
| <b>3</b>        | 0.15  | <b>54</b>            | 0.00  | <b>110</b>         | 164   | <b>165</b>     | 0.01  |
| <b>4</b>        | 0.18  | <b>55</b>            | 0.02  | <b>111</b>         | 0.01  | <b>167</b>     | 0.80  |
| <b>5</b>        | 0.03  | <b>56</b>            | 5.22  | <b>112</b>         | 0.01  | <b>169</b>     | 0.01  |
| <b>6</b>        | 0.16  | <b>57</b>            | 0.01  | <b>114</b>         | 9.83  | <b>170</b>     | 0.97  |
| <b>7</b>        | 0.07  | <b>58</b>            | 0.00  | <b>115</b>         | 32.1  | <b>171/173</b> | 0.82  |
| <b>8</b>        | 0.57  | <b>59/62/75</b>      | 7.68  | <b>117</b>         | 8.85  | <b>172</b>     | 0.25  |
| <b>9</b>        | 0.07  | <b>60</b>            | 161   | <b>118</b>         | 285   | <b>174</b>     | 0.50  |
| <b>10</b>       | 0.04  | <b>61/70/74/76</b>   | 732   | <b>120</b>         | 0.01  | <b>175</b>     | 0.07  |
| <b>11</b>       | 0.32  | <b>63</b>            | 11.8  | <b>121</b>         | 0.00  | <b>176</b>     | 0.03  |
| <b>12/13</b>    | 0.18  | <b>64</b>            | 20.1  | <b>122</b>         | 0.01  | <b>177</b>     | 1.22  |
| <b>14</b>       | 0.00  | <b>66</b>            | 923   | <b>123</b>         | 7.61  | <b>178</b>     | 0.34  |
| <b>15</b>       | 0.13  | <b>67</b>            | 0.10  | <b>126</b>         | 0.01  | <b>179</b>     | 0.04  |
| <b>16</b>       | 0.13  | <b>68</b>            | 0.25  | <b>127</b>         | 0.01  | <b>180/193</b> | 2.18  |
| <b>17</b>       | 0.20  | <b>72</b>            | 0.20  | <b>128/166</b>     | 0.00  | <b>181</b>     | 0.17  |
| <b>18/30</b>    | 1.44  | <b>73</b>            | 0.07  | <b>129/138/163</b> | 117   | <b>182</b>     | 0.11  |
| <b>19</b>       | 0.05  | <b>77</b>            | 0.02  | <b>130</b>         | 5.90  | <b>183</b>     | 1.72  |
| <b>20/28</b>    | 70.8  | <b>78</b>            | 0.02  | <b>131</b>         | 0.48  | <b>184</b>     | 0.12  |
| <b>21/33</b>    | 0.12  | <b>79</b>            | 0.01  | <b>132</b>         | 8.56  | <b>185</b>     | 0.02  |
| <b>22</b>       | 0.07  | <b>80</b>            | 0.00  | <b>133</b>         | 1.55  | <b>186</b>     | 0.01  |
| <b>23</b>       | 0.03  | <b>81</b>            | 0.01  | <b>134</b>         | 0.67  | <b>187</b>     | 1.98  |
| <b>24</b>       | 0.02  | <b>82</b>            | 11.4  | <b>135/151</b>     | 7.22  | <b>188</b>     | 0.10  |
| <b>25</b>       | 0.17  | <b>83</b>            | 0.02  | <b>136</b>         | 0.70  | <b>189</b>     | 0.03  |
| <b>26/29</b>    | 0.30  | <b>84</b>            | 4.23  | <b>137</b>         | 8.46  | <b>190</b>     | 0.17  |
| <b>27</b>       | 0.09  | <b>85/116</b>        | 235   | <b>139/140</b>     | 9.29  | <b>191</b>     | 0.06  |
| <b>31</b>       | 5.98  | <b>86/97/109/119</b> | 77.0  | <b>141</b>         | 4.94  | <b>192</b>     | 0.02  |
| <b>32</b>       | 0.43  | <b>87/125</b>        | 66.5  | <b>142</b>         | 0.01  | <b>194</b>     | 0.23  |
| <b>34</b>       | 0.05  | <b>88</b>            | 0.01  | <b>143</b>         | 0.02  | <b>195</b>     | 0.11  |
| <b>35</b>       | 0.01  | <b>89</b>            | 0.11  | <b>144</b>         | 1.75  | <b>196</b>     | 0.11  |
| <b>36</b>       | 0.01  | <b>90/101/113</b>    | 446   | <b>145</b>         | 0.01  | <b>197</b>     | 0.10  |
| <b>37</b>       | 0.78  | <b>91</b>            | 8.30  | <b>146</b>         | 13.7  | <b>198/199</b> | 0.36  |
| <b>38</b>       | 0.02  | <b>92</b>            | 73.2  | <b>147/149</b>     | 36.1  | <b>200</b>     | 0.05  |
| <b>39</b>       | 0.01  | <b>93/100</b>        | 2.36  | <b>148</b>         | 0.09  | <b>201</b>     | 0.06  |
| <b>40/71</b>    | 4.48  | <b>94</b>            | 0.05  | <b>150</b>         | 0.01  | <b>202</b>     | 0.26  |
| <b>41</b>       | 0.17  | <b>95</b>            | 35.7  | <b>152</b>         | 0.01  | <b>203</b>     | 0.19  |
| <b>42</b>       | 4.94  | <b>96</b>            | 0.02  | <b>153/168</b>     | 82.0  | <b>204</b>     | 0.00  |
| <b>43</b>       | 0.28  | <b>98</b>            | 0.03  | <b>154</b>         | 3.29  | <b>205</b>     | 0.01  |
| <b>44/47/65</b> | 158   | <b>99</b>            | 801   | <b>155</b>         | 0.01  | <b>206</b>     | 0.23  |
| <b>45</b>       | 0.29  | <b>102</b>           | 0.42  | <b>156/157</b>     | 2.33  | <b>207</b>     | 0.05  |
| <b>46</b>       | 0.16  | <b>103</b>           | 0.25  | <b>158</b>         | 13.2  | <b>208</b>     | 0.08  |
| <b>48</b>       | 3.13  | <b>104</b>           | 0.01  | <b>159</b>         | 0.04  | <b>209</b>     | 0.30  |
| <b>49/69</b>    | 62.3  | <b>105</b>           | 109   | <b>160</b>         | 0.12  | <b>SUM</b>     | 5090  |
| <b>50/53</b>    | 0.57  | <b>106</b>           | 0.01  | <b>161</b>         | 0.02  |                |       |

238 **Table S3.9** Average PCB congener concentrations in **serum** of SAM-exposure group. Values are  
 239 expressed in ng/g wet weight.

| PCB             | Conc. | PCB                  | Conc. | PCB                | Conc. | PCB            | Conc. |
|-----------------|-------|----------------------|-------|--------------------|-------|----------------|-------|
| <b>1</b>        | 0.03  | <b>51</b>            | 0.01  | <b>107</b>         | 0.01  | <b>162</b>     | 0.02  |
| <b>2</b>        | 0.04  | <b>52</b>            | 0.49  | <b>108/124</b>     | 0.00  | <b>164</b>     | 0.00  |
| <b>3</b>        | 0.07  | <b>54</b>            | 0.00  | <b>110</b>         | 0.25  | <b>165</b>     | 0.00  |
| <b>4</b>        | 0.09  | <b>55</b>            | 0.02  | <b>111</b>         | 0.00  | <b>167</b>     | 0.03  |
| <b>5</b>        | 0.01  | <b>56</b>            | 0.05  | <b>112</b>         | 0.00  | <b>169</b>     | 0.00  |
| <b>6</b>        | 0.03  | <b>57</b>            | 0.00  | <b>114</b>         | 0.00  | <b>170</b>     | 0.01  |
| <b>7</b>        | 0.01  | <b>58</b>            | 0.00  | <b>115</b>         | 0.00  | <b>171/173</b> | 0.01  |
| <b>8</b>        | 0.07  | <b>59/62/75</b>      | 0.03  | <b>117</b>         | 0.00  | <b>172</b>     | 0.02  |
| <b>9</b>        | 0.01  | <b>60</b>            | 0.29  | <b>118</b>         | 0.59  | <b>174</b>     | 0.01  |
| <b>10</b>       | 0.02  | <b>61/70/74/76</b>   | 0.93  | <b>120</b>         | 0.00  | <b>175</b>     | 0.01  |
| <b>11</b>       | 0.15  | <b>63</b>            | 0.02  | <b>121</b>         | 0.00  | <b>176</b>     | 0.00  |
| <b>12/13</b>    | 0.09  | <b>64</b>            | 0.06  | <b>122</b>         | 0.00  | <b>177</b>     | 0.01  |
| <b>14</b>       | 0.00  | <b>66</b>            | 1.16  | <b>123</b>         | 0.01  | <b>178</b>     | 0.01  |
| <b>15</b>       | 0.06  | <b>67</b>            | 0.01  | <b>126</b>         | 0.00  | <b>179</b>     | 0.01  |
| <b>16</b>       | 0.06  | <b>68</b>            | 0.12  | <b>127</b>         | 0.00  | <b>180/193</b> | 0.02  |
| <b>17</b>       | 0.05  | <b>72</b>            | 0.01  | <b>128/166</b>     | 0.00  | <b>181</b>     | 0.01  |
| <b>18/30</b>    | 0.08  | <b>73</b>            | 0.03  | <b>129/138/163</b> | 0.10  | <b>182</b>     | 0.01  |
| <b>19</b>       | 0.03  | <b>77</b>            | 0.01  | <b>130</b>         | 0.00  | <b>183</b>     | 0.01  |
| <b>20/28</b>    | 0.11  | <b>78</b>            | 0.01  | <b>131</b>         | 0.00  | <b>184</b>     | 0.01  |
| <b>21/33</b>    | 0.06  | <b>79</b>            | 0.00  | <b>132</b>         | 0.02  | <b>185</b>     | 0.01  |
| <b>22</b>       | 0.03  | <b>80</b>            | 0.00  | <b>133</b>         | 0.01  | <b>186</b>     | 0.04  |
| <b>23</b>       | 0.02  | <b>81</b>            | 0.00  | <b>134</b>         | 0.01  | <b>187</b>     | 0.02  |
| <b>24</b>       | 0.01  | <b>82</b>            | 0.02  | <b>135/151</b>     | 0.03  | <b>188</b>     | 0.02  |
| <b>25</b>       | 0.02  | <b>83</b>            | 0.01  | <b>136</b>         | 0.02  | <b>189</b>     | 0.01  |
| <b>26/29</b>    | 0.06  | <b>84</b>            | 0.07  | <b>137</b>         | 0.01  | <b>190</b>     | 0.02  |
| <b>27</b>       | 0.04  | <b>85/116</b>        | 0.46  | <b>139/140</b>     | 0.01  | <b>191</b>     | 0.01  |
| <b>31</b>       | 0.08  | <b>86/97/109/119</b> | 0.10  | <b>141</b>         | 0.01  | <b>192</b>     | 0.01  |
| <b>32</b>       | 0.04  | <b>87/125</b>        | 0.20  | <b>142</b>         | 0.00  | <b>194</b>     | 0.01  |
| <b>34</b>       | 0.02  | <b>88</b>            | 0.01  | <b>143</b>         | 0.00  | <b>195</b>     | 0.01  |
| <b>35</b>       | 0.01  | <b>89</b>            | 0.00  | <b>144</b>         | 0.00  | <b>196</b>     | 0.01  |
| <b>36</b>       | 0.01  | <b>90/101/113</b>    | 1.15  | <b>145</b>         | 0.00  | <b>197</b>     | 0.04  |
| <b>37</b>       | 0.03  | <b>91</b>            | 0.02  | <b>146</b>         | 0.01  | <b>198/199</b> | 0.01  |
| <b>38</b>       | 0.01  | <b>92</b>            | 0.17  | <b>147/149</b>     | 0.09  | <b>200</b>     | 0.02  |
| <b>39</b>       | 0.00  | <b>93/100</b>        | 0.00  | <b>148</b>         | 0.00  | <b>201</b>     | 0.00  |
| <b>40/71</b>    | 0.08  | <b>94</b>            | 0.00  | <b>150</b>         | 0.00  | <b>202</b>     | 0.04  |
| <b>41</b>       | 0.01  | <b>95</b>            | 0.17  | <b>152</b>         | 0.00  | <b>203</b>     | 0.00  |
| <b>42</b>       | 0.03  | <b>96</b>            | 0.00  | <b>153/168</b>     | 0.14  | <b>204</b>     | 0.00  |
| <b>43</b>       | 0.01  | <b>98</b>            | 0.00  | <b>154</b>         | 0.01  | <b>205</b>     | 0.01  |
| <b>44/47/65</b> | 0.29  | <b>99</b>            | 1.49  | <b>155</b>         | 0.00  | <b>206</b>     | 0.11  |
| <b>45</b>       | 0.01  | <b>102</b>           | 0.00  | <b>156/157</b>     | 0.01  | <b>207</b>     | 0.02  |
| <b>46</b>       | 0.08  | <b>103</b>           | 0.00  | <b>158</b>         | 0.00  | <b>208</b>     | 0.01  |
| <b>48</b>       | 0.02  | <b>104</b>           | 0.00  | <b>159</b>         | 0.02  | <b>209</b>     | 0.12  |
| <b>49/69</b>    | 0.29  | <b>105</b>           | 0.28  | <b>160</b>         | 0.00  | <b>SUM</b>     | 12.0  |
| <b>50/53</b>    | 0.09  | <b>106</b>           | 0.00  | <b>161</b>         | 0.00  |                |       |

241 **Table S3.10** Average lipid-adjusted PCB congener concentrations in **serum** of SAM-exposure group.  
 242 Values are expressed in ng/g lipid weight.

| PCB             | Conc. | PCB                  | Conc. | PCB                | Conc. | PCB            | Conc. |
|-----------------|-------|----------------------|-------|--------------------|-------|----------------|-------|
| <b>1</b>        | 9.38  | <b>51</b>            | 2.73  | <b>107</b>         | 2.77  | <b>162</b>     | 6.66  |
| <b>2</b>        | 12.4  | <b>52</b>            | 137   | <b>108/124</b>     | 1.06  | <b>164</b>     | 0.69  |
| <b>3</b>        | 20.2  | <b>54</b>            | 0.61  | <b>110</b>         | 71.3  | <b>165</b>     | 0.69  |
| <b>4</b>        | 24.5  | <b>55</b>            | 5.81  | <b>111</b>         | 0.79  | <b>167</b>     | 7.10  |
| <b>5</b>        | 2.99  | <b>56</b>            | 12.9  | <b>112</b>         | 0.58  | <b>169</b>     | 1.37  |
| <b>6</b>        | 9.56  | <b>57</b>            | 1.03  | <b>114</b>         | 0.35  | <b>170</b>     | 3.20  |
| <b>7</b>        | 4.10  | <b>58</b>            | 0.50  | <b>115</b>         | 0.74  | <b>171/173</b> | 3.18  |
| <b>8</b>        | 18.8  | <b>59/62/75</b>      | 8.77  | <b>117</b>         | 0.67  | <b>172</b>     | 4.60  |
| <b>9</b>        | 2.89  | <b>60</b>            | 81.1  | <b>118</b>         | 165   | <b>174</b>     | 3.29  |
| <b>10</b>       | 5.66  | <b>61/70/74/76</b>   | 260   | <b>120</b>         | 0.87  | <b>175</b>     | 3.01  |
| <b>11</b>       | 43.2  | <b>63</b>            | 4.46  | <b>121</b>         | 0.56  | <b>176</b>     | 0.96  |
| <b>12/13</b>    | 24.1  | <b>64</b>            | 17.7  | <b>122</b>         | 1.34  | <b>177</b>     | 2.65  |
| <b>14</b>       | 0.00  | <b>66</b>            | 322   | <b>123</b>         | 1.80  | <b>178</b>     | 1.80  |
| <b>15</b>       | 17.3  | <b>67</b>            | 1.60  | <b>126</b>         | 0.00  | <b>179</b>     | 2.05  |
| <b>16</b>       | 17.7  | <b>68</b>            | 34.31 | <b>127</b>         | 0.74  | <b>180/193</b> | 4.72  |
| <b>17</b>       | 13.1  | <b>72</b>            | 3.07  | <b>128/166</b>     | 0.00  | <b>181</b>     | 2.50  |
| <b>18/30</b>    | 22.8  | <b>73</b>            | 9.13  | <b>129/138/163</b> | 29.3  | <b>182</b>     | 2.60  |
| <b>19</b>       | 7.08  | <b>77</b>            | 2.50  | <b>130</b>         | 1.22  | <b>183</b>     | 2.54  |
| <b>20/28</b>    | 32.2  | <b>78</b>            | 2.45  | <b>131</b>         | 1.15  | <b>184</b>     | 2.58  |
| <b>21/33</b>    | 16.2  | <b>79</b>            | 0.58  | <b>132</b>         | 6.41  | <b>185</b>     | 2.86  |
| <b>22</b>       | 9.53  | <b>80</b>            | 0.50  | <b>133</b>         | 1.59  | <b>186</b>     | 9.72  |
| <b>23</b>       | 4.43  | <b>81</b>            | 1.05  | <b>134</b>         | 1.43  | <b>187</b>     | 7.02  |
| <b>24</b>       | 3.11  | <b>82</b>            | 6.65  | <b>135/151</b>     | 8.36  | <b>188</b>     | 4.54  |
| <b>25</b>       | 6.58  | <b>83</b>            | 3.23  | <b>136</b>         | 6.10  | <b>189</b>     | 3.60  |
| <b>26/29</b>    | 17.0  | <b>84</b>            | 20.5  | <b>137</b>         | 3.72  | <b>190</b>     | 6.96  |
| <b>27</b>       | 11.9  | <b>85/116</b>        | 127   | <b>139/140</b>     | 3.80  | <b>191</b>     | 2.68  |
| <b>31</b>       | 22.7  | <b>86/97/109/119</b> | 28.4  | <b>141</b>         | 3.28  | <b>192</b>     | 2.59  |
| <b>32</b>       | 10.5  | <b>87/125</b>        | 56.7  | <b>142</b>         | 1.17  | <b>194</b>     | 4.08  |
| <b>34</b>       | 6.62  | <b>88</b>            | 1.41  | <b>143</b>         | 0.99  | <b>195</b>     | 2.52  |
| <b>35</b>       | 1.63  | <b>89</b>            | 0.96  | <b>144</b>         | 0.97  | <b>196</b>     | 1.77  |
| <b>36</b>       | 1.41  | <b>90/101/113</b>    | 322   | <b>145</b>         | 0.65  | <b>197</b>     | 10.9  |
| <b>37</b>       | 7.88  | <b>91</b>            | 6.04  | <b>146</b>         | 2.70  | <b>198/199</b> | 2.83  |
| <b>38</b>       | 2.73  | <b>92</b>            | 47.8  | <b>147/149</b>     | 23.9  | <b>200</b>     | 6.69  |
| <b>39</b>       | 1.27  | <b>93/100</b>        | 1.31  | <b>148</b>         | 1.21  | <b>201</b>     | 1.19  |
| <b>40/71</b>    | 21.2  | <b>94</b>            | 0.93  | <b>150</b>         | 0.94  | <b>202</b>     | 11.1  |
| <b>41</b>       | 2.27  | <b>95</b>            | 48.9  | <b>152</b>         | 0.67  | <b>203</b>     | 0.99  |
| <b>42</b>       | 8.85  | <b>96</b>            | 0.76  | <b>153/168</b>     | 39.4  | <b>204</b>     | 0.00  |
| <b>43</b>       | 1.47  | <b>98</b>            | 0.88  | <b>154</b>         | 1.62  | <b>205</b>     | 1.68  |
| <b>44/47/65</b> | 81.9  | <b>99</b>            | 416   | <b>155</b>         | 0.64  | <b>206</b>     | 31.1  |
| <b>45</b>       | 1.95  | <b>102</b>           | 1.17  | <b>156/157</b>     | 3.37  | <b>207</b>     | 5.18  |
| <b>46</b>       | 22.2  | <b>103</b>           | 0.78  | <b>158</b>         | 1.11  | <b>208</b>     | 3.25  |
| <b>48</b>       | 6.23  | <b>104</b>           | 0.64  | <b>159</b>         | 5.27  | <b>209</b>     | 34.0  |
| <b>49/69</b>    | 82.2  | <b>105</b>           | 78.2  | <b>160</b>         | 0.63  | <b>SUM</b>     | 3350  |
| <b>50/53</b>    | 25.1  | <b>106</b>           | 0.78  | <b>161</b>         | 0.68  |                |       |



244 **Table S4.** Redox parameters and redox potentials ( $E_h$ ) in plasma.

|      | CySS<br>( $\mu\text{M}$ ) | Cys<br>( $\mu\text{M}$ ) | CySSG<br>( $\mu\text{M}$ ) | GSH<br>( $\mu\text{M}$ ) | GSSG<br>( $\mu\text{M}$ ) | $E_h$<br>(GSSG/GSH)<br>(mV) | $E_h$<br>(CySS/Cys)<br>(mV) | Total GSH<br>( $\mu\text{M}$ ) | Total Cys<br>( $\mu\text{M}$ ) |
|------|---------------------------|--------------------------|----------------------------|--------------------------|---------------------------|-----------------------------|-----------------------------|--------------------------------|--------------------------------|
| SAM  | 62.6 $\pm$ 9.5            | 29.4 $\pm$ 7.3           | 25.1 $\pm$ 6.9             | 28.0 $\pm$ 8.0           | 4.8 $\pm$ 2.2             | -152.1 $\pm$ 13.5           | -103.7 $\pm$ 5.7            | 62.6 $\pm$ 16.3                | 179.6 $\pm$ 25.1               |
| Sham | 64.4 $\pm$ 12.6           | 28.3 $\pm$ 3.5           | 25.3 $\pm$ 9.9             | 25.1 $\pm$ 4.0           | 5.2 $\pm$ 3.8             | -148.1 $\pm$ 6.4            | -102.9 $\pm$ 4.5            | 60.9 $\pm$ 19.5                | 182.4 $\pm$ 28.4               |

245 Values are expressed as mean  $\pm$  standard deviation (n = 8). CySS: cystine; Cys: cysteine; CySSG: cysteine-glutathione disulfide;

246 GSH: glutathione; GSSG: glutathione disulfide.  $E_h$  were calculated with the Nernst equation for pH 7.4:  $E_h$  (GSSG/GSH) = -264 + 30

247 \* log (GSSG / GSH<sup>2</sup>);  $E_h$  (CySS / Cys) = -250 + 30 \* log (CySS / Cys<sup>2</sup>).<sup>19</sup>

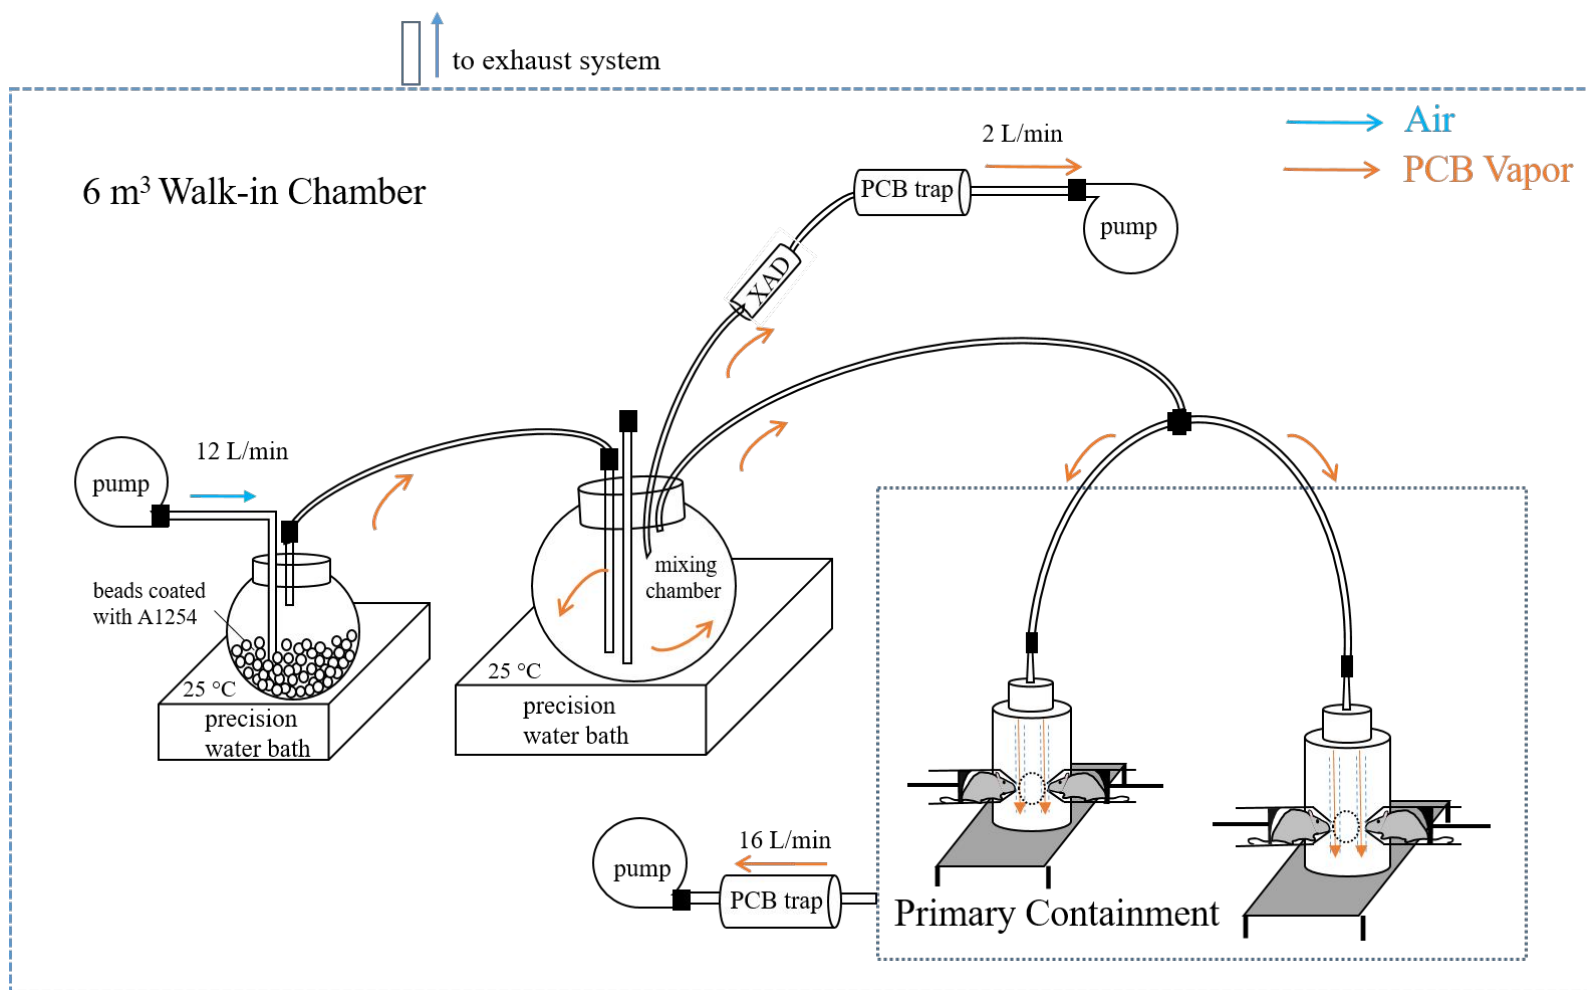

248

249 **Figure S1.** Schematic of PCB generation and nose-only exposure system.

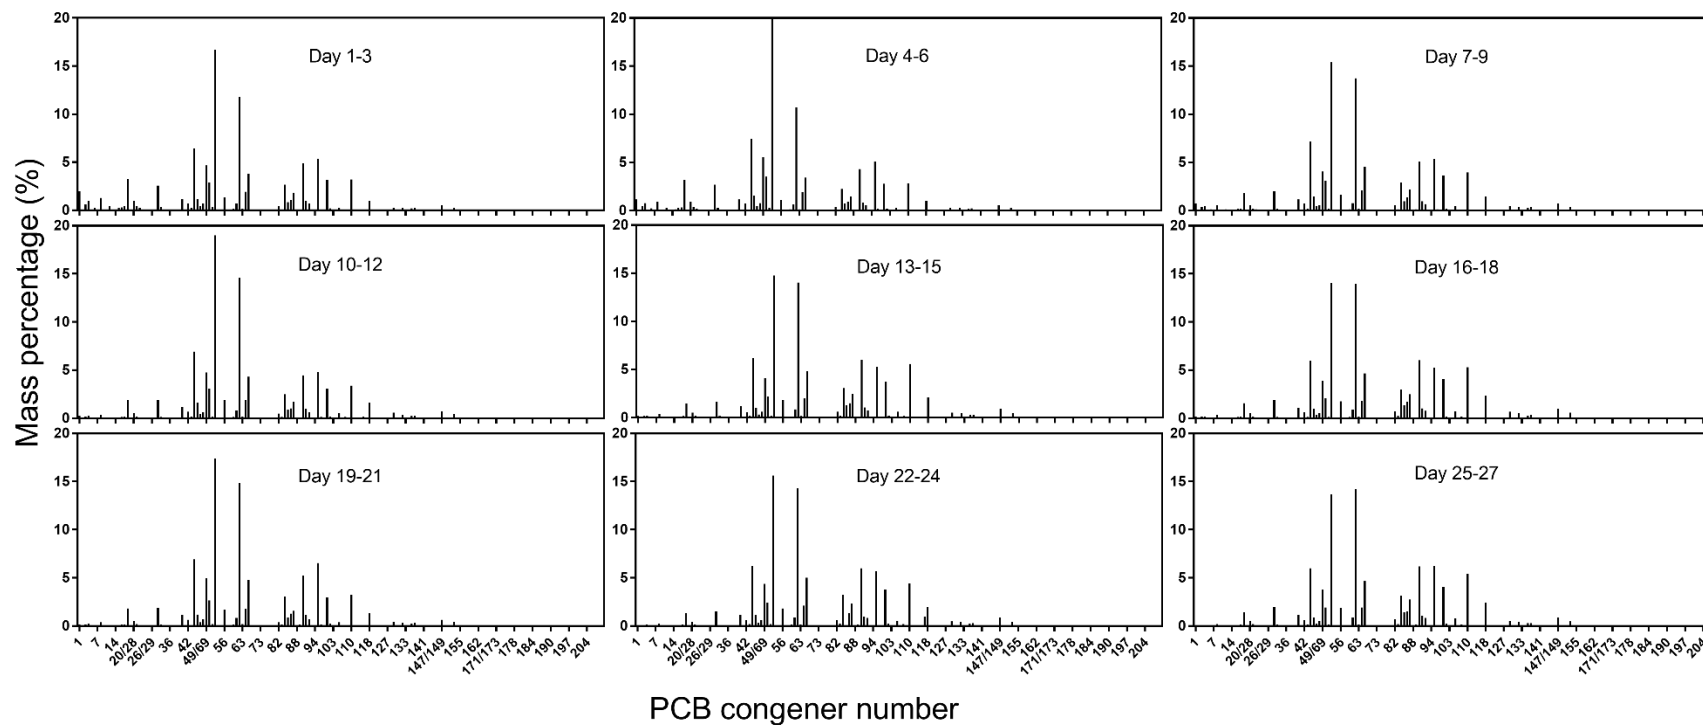

250

251 **Figure S2.** PCB congener profile (in mass percentage, %) in sequential three-day collections of PCB vapor using XAD.

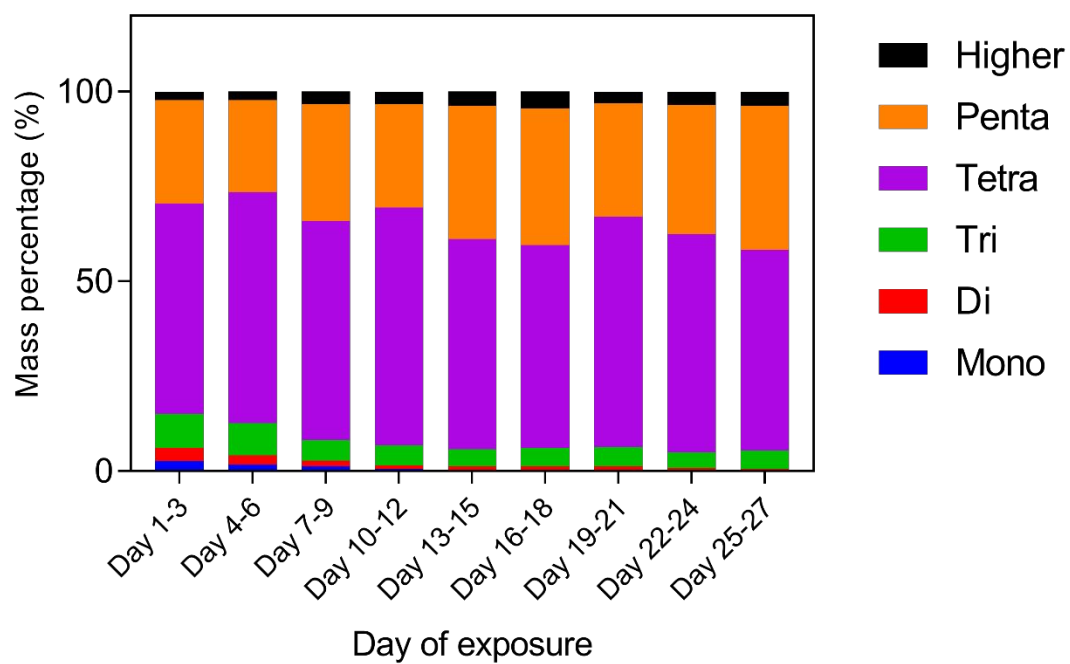

252

253 **Figure S3.** PCB homologue composition (in mass percentage, %) in sequential three-day collections of

254 PCB vapor using XAD.

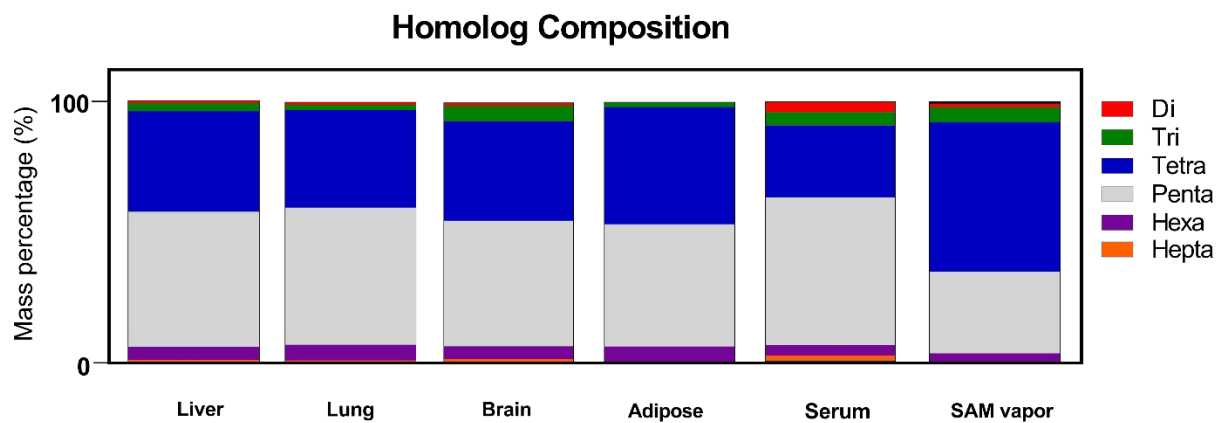

255

256 **Figure S4.** PCB homolog composition (in mass percentage, %) in tissues of SAM-exposed rats

257 and in generated SAM vapor.

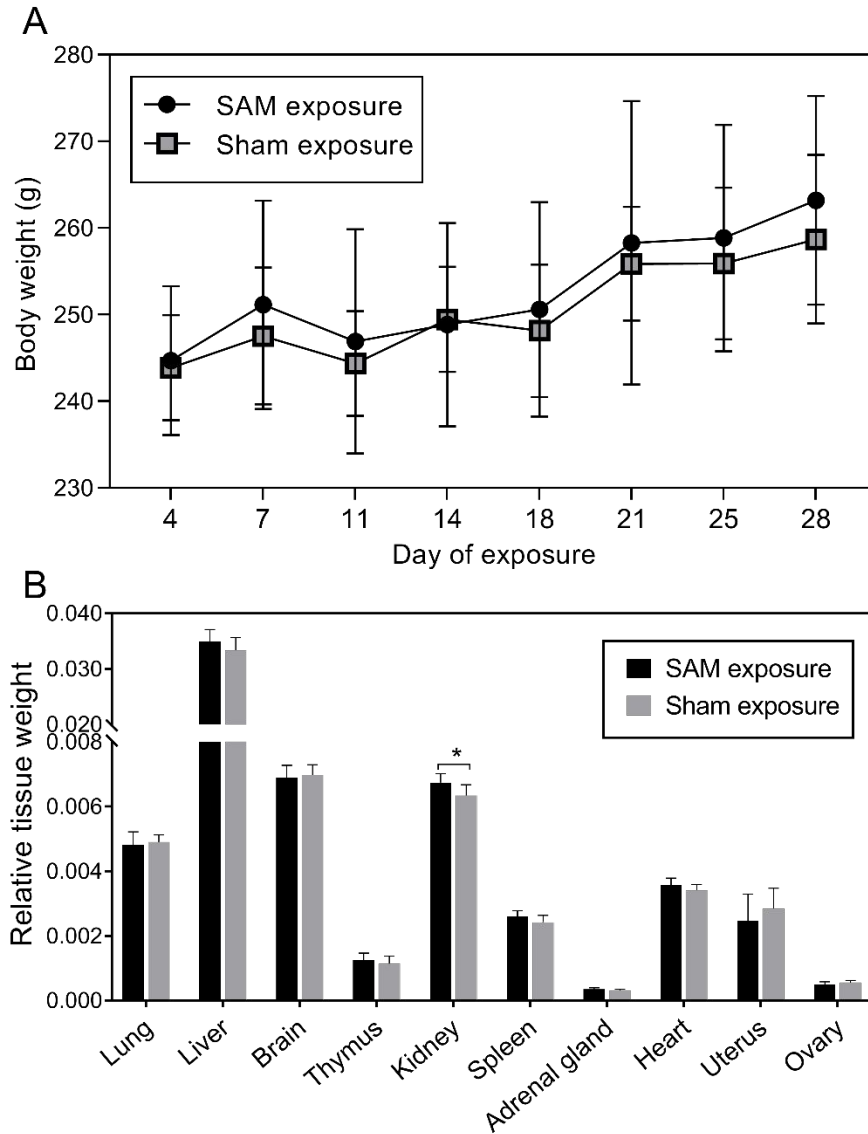

258

259 **Figure S5.** Body weight (S5A, g) and relative tissue weight (S5B, g/g body weight) of rats in  
 260 SAM- and sham-exposed groups. No significant differences were found between the groups in  
 261 body weight. Relative kidney weight in SAM was significantly higher than sham (\* $p < 0.05$ ,  
 262 Student's t-test). Values were expressed as mean  $\pm$  standard deviation (n = 8).

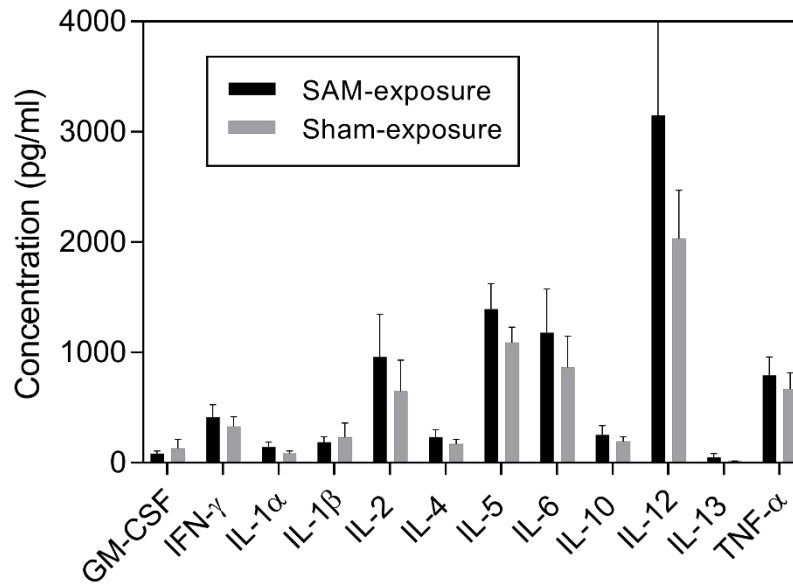

263

264 **Figure S6.** Cytokine concentrations (pg/ml) in plasma from rats in sham- and SAM-exposure  
265 groups. Values are expressed as mean  $\pm$  standard error (n = 5). No significant differences were  
266 found between sham and SAM rats.

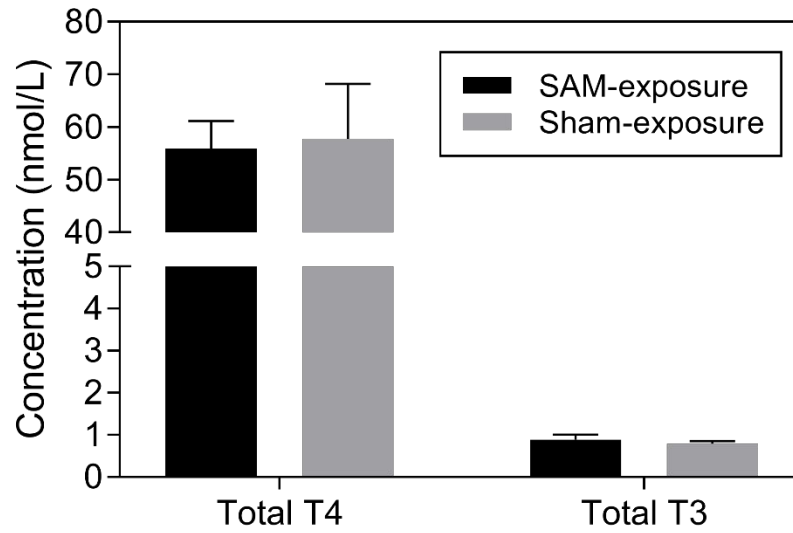

267

268 **Figure S7.** Thyroid hormone (total T4 and total T3) concentrations (nmol/L) in serum after  
269 exposed to SAM vapor. Values are graphed as mean  $\pm$  standard deviation (n = 8). There were no  
270 significant differences between sham and SAM rats.



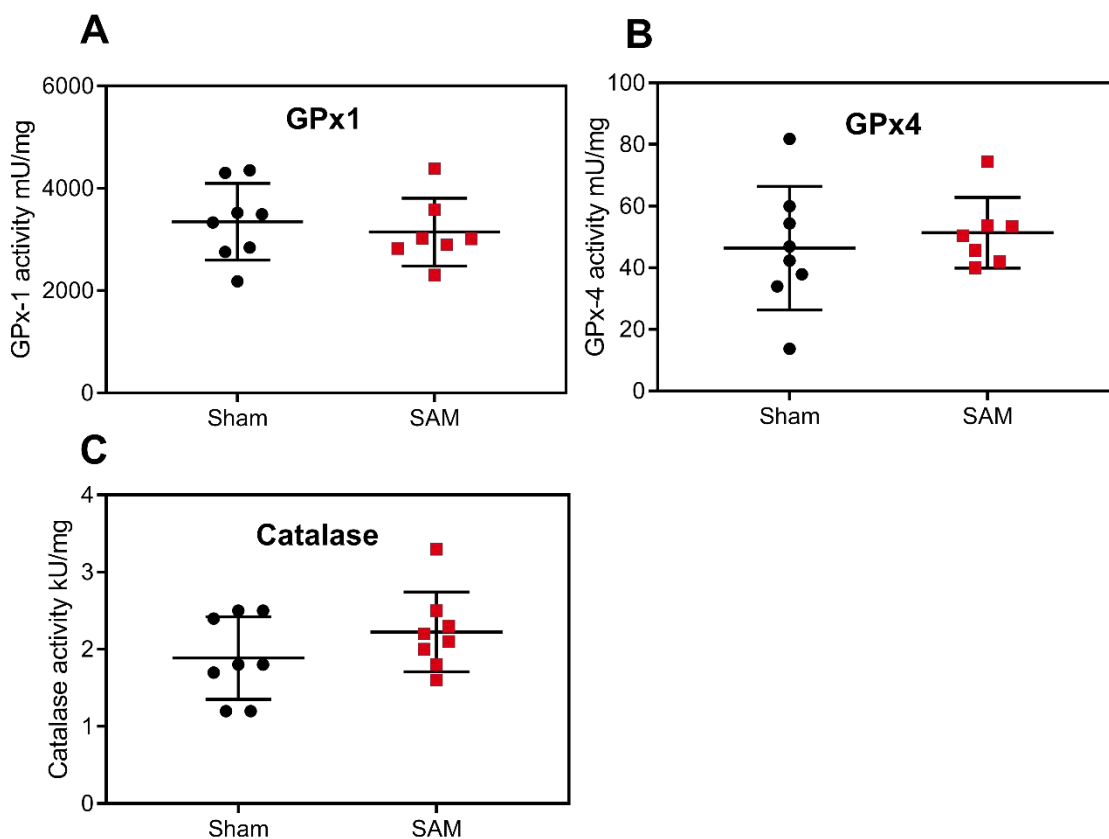

271

272 **Figure S8.** Antioxidant enzyme activities in liver. A: GPx1, B: GPx4, and C: catalase activity.

273 Activities were normalized by protein content. Each data point represents the mean of three

274 replicates of one sample of liver tissue. Values are expressed as mean  $\pm$  standard deviation ( $n = 8$

275 for sham,  $n = 7$  for SAM). No significant differences were found between sham and SAM rats ( $p$

276  $>0.05$ ).

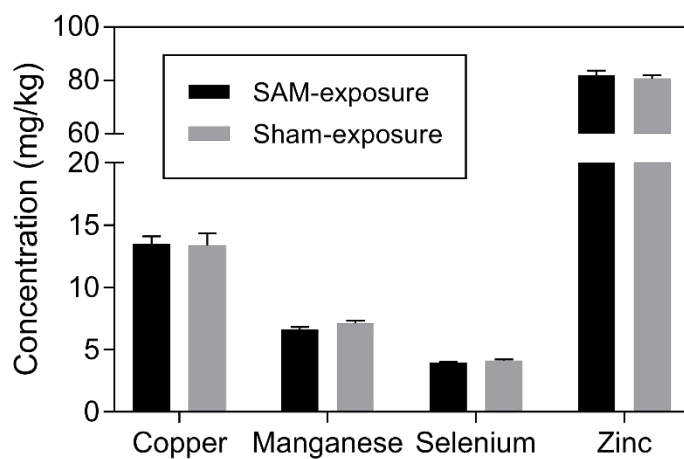

277

278 **Figure S9.** Trace elements content (Cu, Mn, Se, and Zn) in dried liver from rats exposed to SAM  
279 and sham. Values are expressed as mean  $\pm$  standard error (n = 6). None of the trace elements  
280 were significantly different between SAM and sham exposed rats.

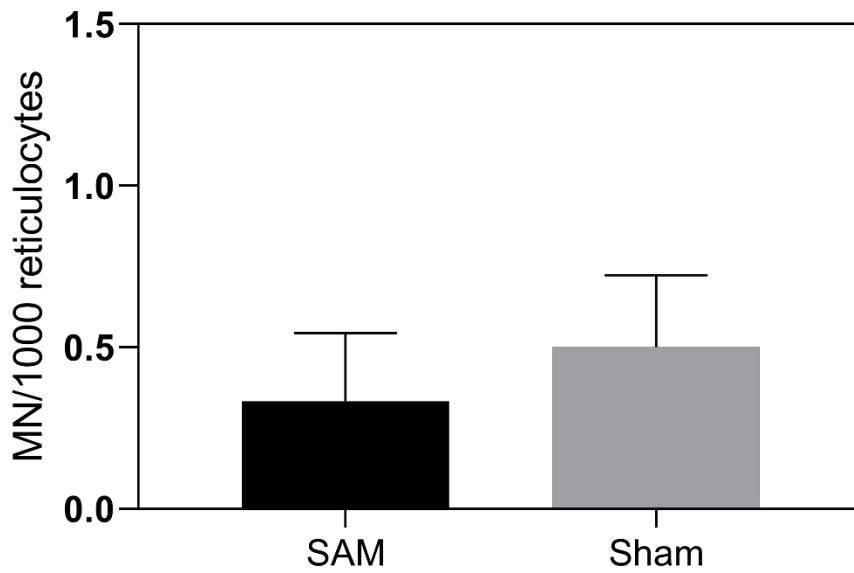

281

282 **Figure S10.** Micronuclei (MN) number expressed as per 1000 reticulocytes (immature  
283 erythrocytes) from acridine orange-coated slides in SAM-exposed and sham-exposed group.  
284 Values are graphed as mean  $\pm$  standard error (n = 6). No significant differences were found  
285 between sham and SAM rats.

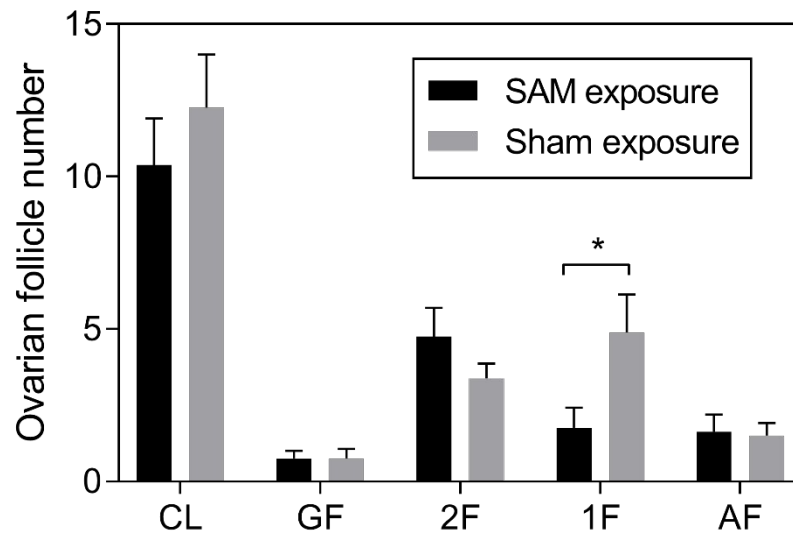

286

287 **Figure S11.** Ovarian follicle number in a single section from SAM- and sham-exposed rats.

288 Values are expressed as mean  $\pm$  standard error (n = 7). \* $p$  < 0.05, compared to sham. CL: corpus

289 luteum; GF: graafian follicle; 2F: secondary follicle; 1F: primary follicle; AF: atretic follicle.

## 290 REFERENCES

- 291 1. USEPA, Method 1668, revision A: Chlorinated biphenyl congeners in waters, soil,  
292 sediment, and tissue by HRGC/HRMS. In United States Environmental Protection Agency  
293 Office of Water: Washington, DC: 1999.
- 294 2. Marek, R. F.; Thorne, P. S.; Herkert, N. J.; Awad, A. M.; Hornbuckle, K. C., Airborne  
295 PCBs and OH-PCBs Inside and Outside Urban and Rural U.S. Schools. *Environ Sci Technol*  
296 **2017**, *51*, (14), 7853-7860.
- 297 3. Phillips, D. L.; Pirkle, J. L.; Burse, V. W.; Bernert, J. T.; Henderson, L. O.; Needham, L.  
298 L., Chlorinated hydrocarbon levels in human serum: effects of fasting and feeding. *Archives of*  
299 *environmental contamination toxicology* **1989**, *18*, (4), 495-500.
- 300 4. Vorhees, C. V.; Williams, M. T., Morris water maze: procedures for assessing spatial and  
301 related forms of learning and memory. *Nat Protoc* **2006**, *1*, (2), 848-58.
- 302 5. Lowry, O. H.; Rosebrough, N. J.; Farr, A. L.; Randall, R. J., Protein measurement with  
303 the Folin phenol reagent. *The Journal of biological chemistry* **1951**, *193*, (1), 265-75.
- 304 6. Lawrence, R. A.; Burk, R. F., Glutathione peroxidase activity in selenium-deficient rat  
305 liver. *Biochem Biophys Res Commun* **1976**, *71*, (4), 952-8.
- 306 7. Greenwald, R. A., *CRC handbook of methods for oxygen radical research*. CRC Press:  
307 Boca Raton, FL, 1985; p 447.
- 308 8. Stolwijk, J. M.; Falls-Hubert, K. C.; Searby, C. C.; Wagner, B. A.; Buettner, G. R.,  
309 Simultaneous detection of the enzyme activities of GPx1 and GPx4 guide optimization of  
310 selenium in cell biological experiments. *Redox Biol* **2020**, *32*, 101518.
- 311 9. Beers, R. F., Jr.; Sizer, I. W., A spectrophotometric method for measuring the breakdown  
312 of hydrogen peroxide by catalase. *The Journal of biological chemistry* **1952**, *195*, (1), 133-40.

- 313 10. Aebi, H., Catalase in vitro. *Methods Enzymol* **1984**, *105*, 121-6.
- 314 11. Nelson, D. P.; Kiesow, L. A., Enthalpy of decomposition of hydrogen peroxide by  
315 catalase at 25C (with molar extinction coefficients of H<sub>2</sub>O<sub>2</sub> solutions in the UV). *Analytical*  
316 *biochemistry* **1972**, *49*, (2), 474-8.
- 317 12. Hayashi, M.; Morita, T.; Kodama, Y.; Sofuni, T.; Ishidate, M., Jr., The micronucleus  
318 assay with mouse peripheral blood reticulocytes using acridine orange-coated slides. *Mutat Res*  
319 **1990**, *245*, (4), 245-9.
- 320 13. Zhang, X.; Goncalves, R.; Mosser, D. M., The isolation and characterization of murine  
321 macrophages. *Curr Protoc Immunol* **2008**, *83*, (1), 14.1.1-14.1.14.
- 322 14. Banerjee, P. P.; Banerjee, S.; Zirkin, B. R.; Brown, T. R., Telomerase activity in normal  
323 adult Brown Norway rat seminal vesicle: regional distribution and age-dependent changes.  
324 *Endocrinology* **1998**, *139*, (3), 1075-81.
- 325 15. Li, X.; Li, Y.; Kang, X.; Guo, K.; Li, H.; Gao, D.; Sun, L.; Liu, Y., Dynamic alteration of  
326 protein expression profiles during neoplastic transformation of rat hepatic oval-like cells. *Cancer*  
327 *science* **2010**, *101*, (5), 1099-107.
- 328 16. Denner, D. R.; Sangwan, N.; Becker, J. B.; Hogarth, D. K.; Oldham, J.; Castillo, J.;  
329 Sperling, A. I.; Solway, J.; Naureckas, E. T.; Gilbert, J. A.; White, S. R., Corticosteroid therapy  
330 and airflow obstruction influence the bronchial microbiome, which is distinct from that of  
331 bronchoalveolar lavage in asthmatic airways. *J Allergy Clin Immunol* **2016**, *137*, (5), 1398-1405.
- 332 17. Caporaso, J. G.; Kuczynski, J.; Stombaugh, J.; Bittinger, K.; Bushman, F. D.; Costello, E.  
333 K.; Fierer, N.; Pena, A. G.; Goodrich, J. K.; Gordon, J. I.; Huttley, G. A.; Kelley, S. T.; Knights,  
334 D.; Koenig, J. E.; Ley, R. E.; Lozupone, C. A.; McDonald, D.; Muegge, B. D.; Pirrung, M.;  
335 Reeder, J.; Sevinsky, J. R.; Turnbaugh, P. J.; Walters, W. A.; Widmann, J.; Yatsunenko, T.;

- 336 Zaneveld, J.; Knight, R., QIIME allows analysis of high-throughput community sequencing data.  
337 *Nat Methods* **2010**, 7, (5), 335-6.
- 338 18. Arndt, D.; Xia, J.; Liu, Y.; Zhou, Y.; Guo, A. C.; Cruz, J. A.; Sineelnikov, I.; Budwill, K.;  
339 Nesbo, C. L.; Wishart, D. S., METAGENassist: a comprehensive web server for comparative  
340 metagenomics. *Nucleic Acids Res* **2012**, 40, (W1), W88-95.
- 341 19. Jones, D. P.; Carlson, J. L.; Mody, V. C.; Cai, J.; Lynn, M. J.; Sternberg, P., Redox state  
342 of glutathione in human plasma. *Free Radic Biol Med* **2000**, 28, (4), 625-35.

343
